# Supplementary material for: MON-2, a Golgi protein, mediates autophagy-dependent longevity in Caenorhabditis elegans
Source: PubMed Central journal article supplement — Sci Adv. 2021 Dec 3;7(49):eabj8156. doi: 10.1126/sciadv.abj8156 (PMC8641931; doi:10.1126/sciadv.abj8156), 2021-12-03
Supplement: sciadv.abj8156_sm.pdf [file sciadv.abj8156_sm.pdf]

Supplementary Materials for  
**MON-2, a Golgi protein, mediates autophagy-dependent longevity in  
*Caenorhabditis elegans***

Yoonji Jung, Murat Artan, Nari Kim, Jeonghun Yeom, Ara B. Hwang, Dae-Eun Jeong, Özlem Altintas, Keunhee Seo, Mihwa Seo, Dongyeop Lee, Wooseon Hwang, Yujin Lee, Jooyeon Sohn, Eun Ji E. Kim, Sungeun Ju, Seong Kyu Han, Hyun-Jun Nam, Linnea Adams, Youngjae Ryu, Dong Jin Moon, Chanhee Kang, Joo-Yeon Yoo, Sang Ki Park, Chang Man Ha, Malene Hansen, Sanguk Kim, Cheolju Lee\*, Seung-Yeol Park\*, Seung-Jae V. Lee\*

\*Corresponding author. Email: seungjaevlee@kaist.ac.kr (S.-J.V.L.); seungpark@postech.ac.kr (S.-Y.P.); clec270@kist.re.kr (C.L.)

Published 3 December 2021, *Sci. Adv.* **7**, eabj8156 (2021)  
DOI: 10.1126/sciadv.abj8156

**This PDF file includes:**

Figs. S1 to S4  
Tables S1 to S6  
References

# Figure S1

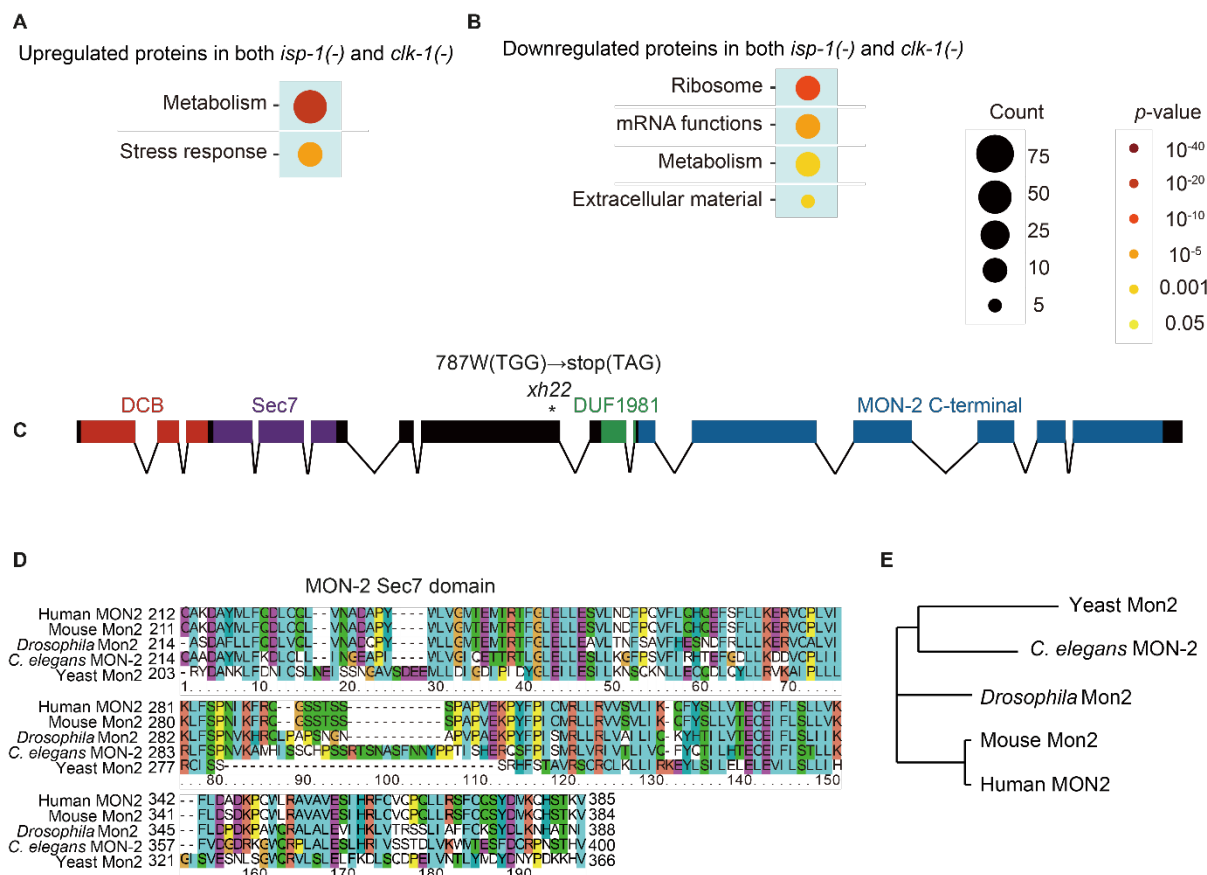

**Fig. S1. The Sec 7 domain of MON-2 is highly conserved across phyla.** A-B. WormCAT gene set enrichment analysis (73) of proteins whose levels increased (A) or decreased (B)  $\geq 1.5$ -fold in both *isp-1(qm150)* [*isp-1(-)*] and *clk-1(qm30)* [*clk-1(-)*] animals compared with those in wild-type (WT) animals. WormCAT analysis indicates that metabolism and stress response were enriched among proteins upregulated in *isp-1(-)* and *clk-1(-)* mutants. Ribosome, mRNA functions, metabolism and extracellular material were enriched among proteins downregulated in *isp-1(-)* and *clk-1(-)* mutants. The sizes of circles indicate gene counts, and the colors of circles indicate p-values obtained by using Fisher's exact test. The number of hit RNAi clones from our RNAi screen that significantly affected lifespan using *isp-1(qm150)*; *ctb-1(qm189)* [*isp-1(-)*; *ctb-1(-)*] mutants was substantially decreased after confirmation using *isp-1(-)* single mutants. First, it is possible that *ctb-1(-)* mutation may have altered the effect of RNAi clones on the lifespan of *isp-1(-)* mutants. A previous study reported that the expression level of *gst-4p::gfp*, a reporter of SKN-1/NRF activity, is increased by genetic inhibition of *isp-1* but decreased by *ctb-1(-)* mutation (74). Decreased activity of complex I by *isp-1(-)* is also suppressed by *ctb-1(-)*, which does not cause additive effects on the activity of complex III downregulated by *isp-1(-)* (75). Therefore, we speculate that *ctb-1(-)* may modulate the effects of some RNAi clones on the lifespan of *isp-1(-)* single mutants. Second, narrowing down to a small number of candidates by performing a secondary screen from a large-scale primary RNAi screen is not rare. For example,

a previous study that used *isp-1(-); ctb-1(-)* mutants for an RNAi screen targeting 387 transcription factor-encoding genes identified 17 genes whose knockdown significantly decreases the lifespan of *isp-1(-); ctb-1(-)* double mutants (39). After further experiments and confirmation using *isp-1(-)* mutants, they narrowed down candidates to three RNAi clones. Our group also reported that lifespan data obtained by using RNAi-mediated knockdown are not always recapitulated with the loss of function mutations (76, 23). In this study, we actually obtained very consistent lifespan results with all three tested mutants, *mon-2(xh22)*, *hrpu-2(tm1474)*, and *patr-1(gk155841)*, and with the RNAi-based screen (Figure 2 and Table S2), further validating our RNAi screen. **C.** Structure of the *C. elegans mon-2* gene. Red: dimerization and cyclophilin-binding (DCB) domain; purple: Sec7 domain involved in guanine nucleotide exchange; *xh22* is a G-to-A base change that generates a premature termination codon; green: domain of unknown function 1981 (DUF1981); blue: MON-2 C-terminal domain. **D.** The Sec7 domain of MON-2 is conserved from yeast to humans. **E.** Phylogenetic tree showing sequence similarities among MON-2/MON2 proteins in humans, mice, *Drosophila*, *C. elegans*, and yeast.

# Figure S2

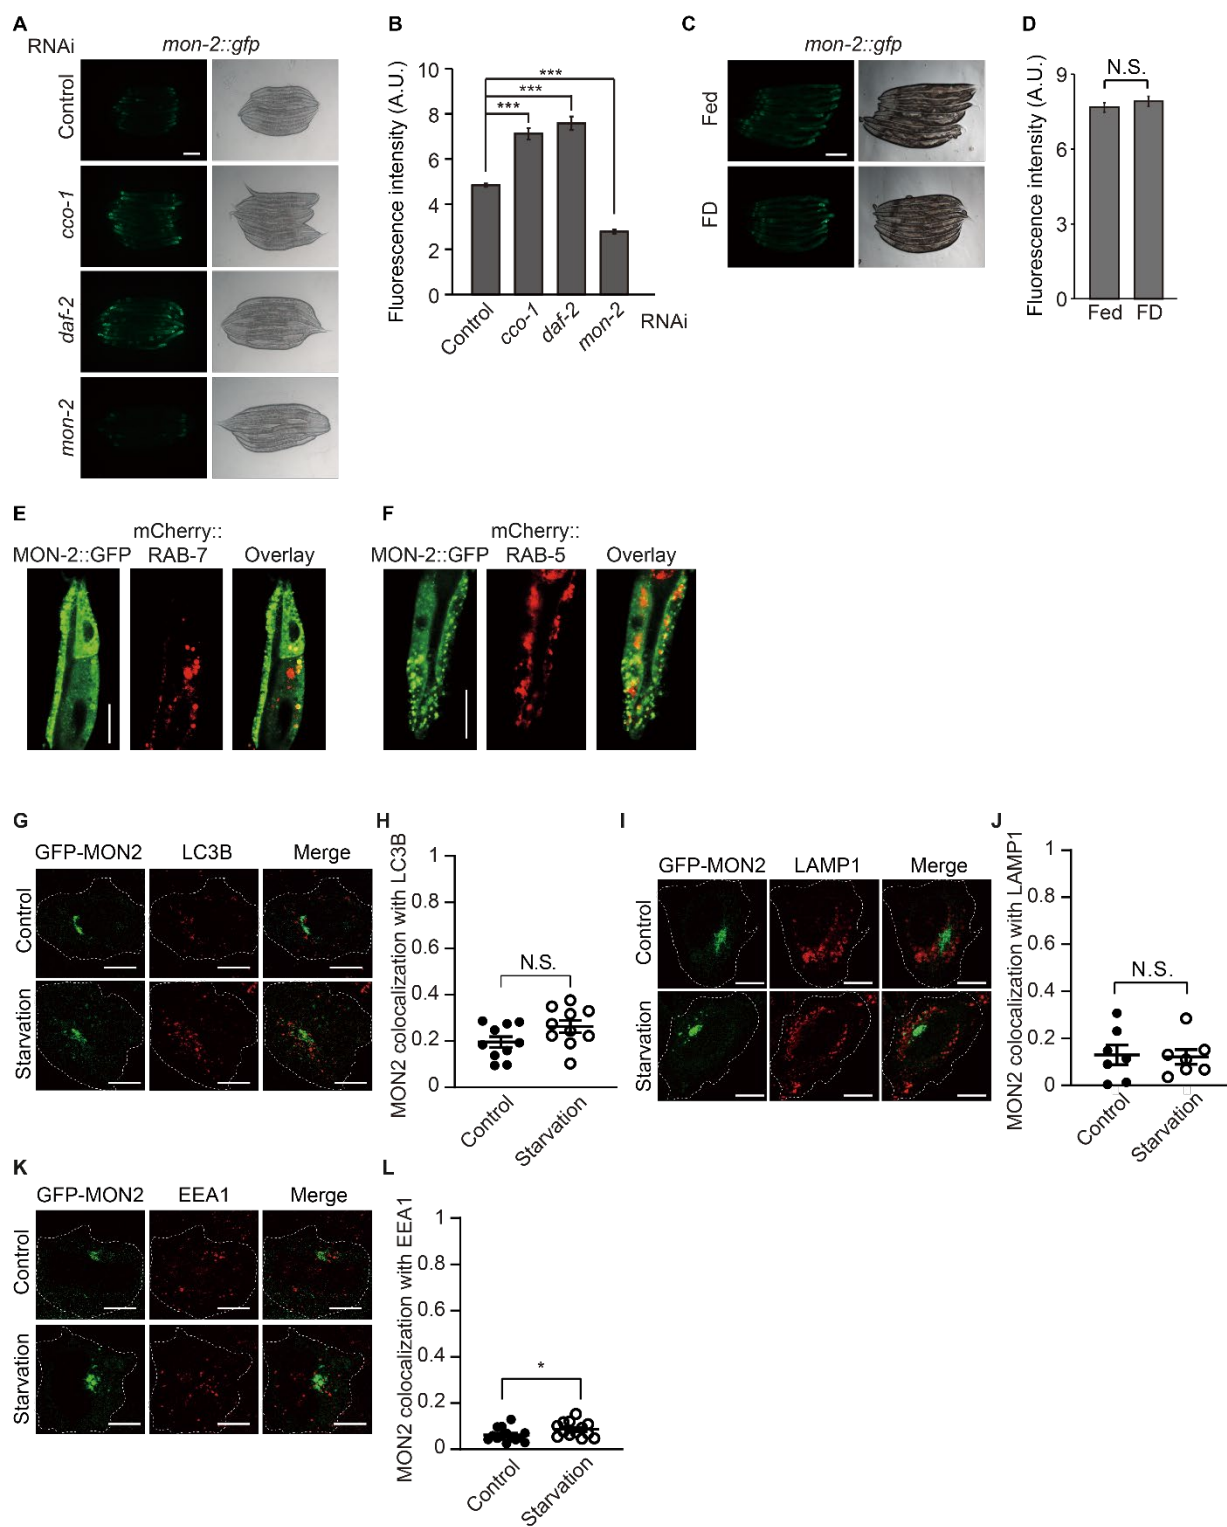

**Fig. S2. Changes in MON-2 levels caused by various longevity interventions and colocalization of MON-2/MON2 with markers of various subcellular organelles. A. *daf-2***

RNAi or *cco-1* RNAi increased the levels of MON-2::GFP. *mon-2* RNAi significantly decreased the GFP level, validating the efficiency of RNAi. L2 or L3 larvae were used for imaging. Scale bar: 100  $\mu$ m. **B.** Quantification of fluorescence images in panel A ( $n = 3$ , > 54 animals). **C.** Food deprivation (FD) for 6 h did not alter the level of MON-2::GFP. Day 2 adult animals were used for retaining consistency with lifespan assays with FD. Scale bar: 200  $\mu$ m. **D.** Quantification of fluorescence images in panel C ( $n = 3$ , > 48 animals). **E.** Fluorescence microscope images of intestinal cells in transgenic animals expressing *mon-2::gfp*, the lysosome-specific marker *mCherry::rab-7*, and the overlay of the two images. Scale bar: 20  $\mu$ m. **F.** Fluorescence microscope images of intestinal cells in transgenic animals expressing *mon-2::gfp*, the endosome-specific marker *mCherry::rab-5*, and the overlay of the two images. Scale bar: 20  $\mu$ m. **G-L.** Colocalization of MON2 with LC3B, an autophagy marker ( $N = 8$ , 8) (**G-H**), LAMP1, a lysosome marker ( $N = 7$ , 7) (**I-J**), and EEA1, an early endosome marker ( $N = 14$ , 13) (**K-L**) in HeLa cells. Scale bars: 10  $\mu$ m. For all the panels, error bars represent the s.e.m. (\* $p < 0.05$ , \*\*\* $p < 0.001$ , N.S.: not significant; two-tailed Student's *t*-test). For all the graphs, each dot represents a result from a single cell.

## Figure S3

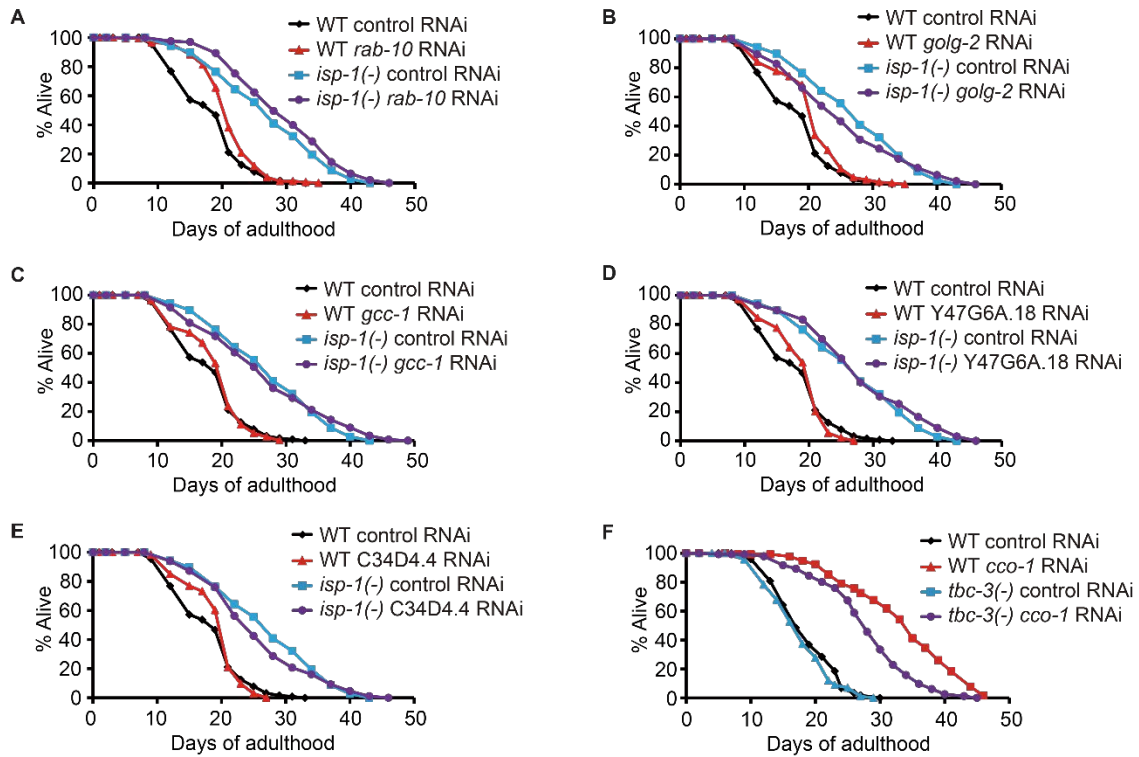

**Fig. S3. Effects of knocking down genes encoding various Golgi components on the long lifespan of mitochondrial respiration mutants.** A-E. RNAi-mediated knockdown of *rab-10*/Rab-like GTPase (A), *golg-2*/Golgin family member (B), *gcc-1*/coiled coil protein predicted to function in transport between early endosomes and the trans-Golgi network (C), Y47G6A.18/ortholog of human Golgi phosphoprotein 3 (D), or C34D4.4/trans-Golgi network vesicle protein (E) did not shorten the lifespan of wild-type (WT) or *isp-1(qm150)* [*isp-1(-)*] animals. F. *tbc-3(xh23)* [*tbc-3(-)*] mutations decreased longevity conferred by *cco-1* RNAi. See Table S5 for values and statistical analyses of the lifespan data.

# Figure S4

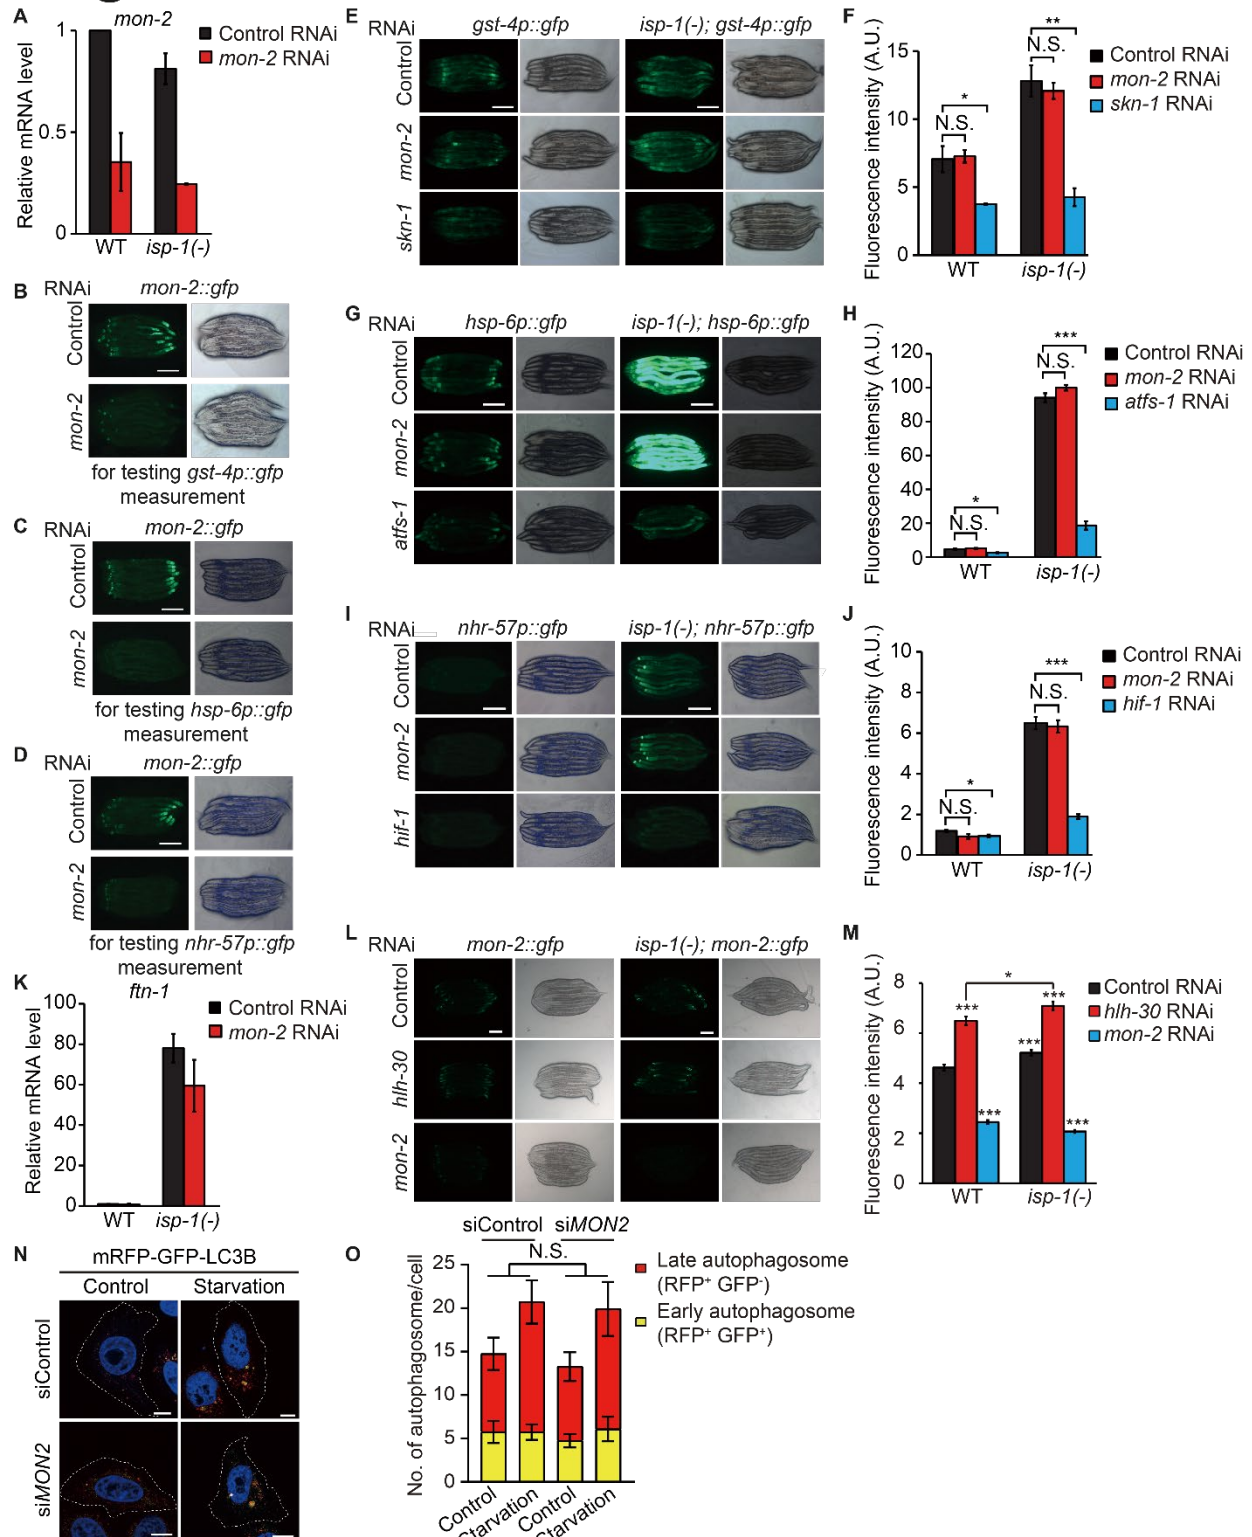

**Fig. S4. *mon-2* RNAi in *C. elegans* has minor or no effects on SKN-1, UPR<sup>mt</sup>, HIF-1, or CEP-1 activity, and knockdown of mammalian *MON2* does not affect the pattern of mRFP-**

**GFP-LC3B. A.** *mon-2* RNAi effectively reduced the mRNA level of *mon-2* in both wild-type (WT) and *isp-1(qm150)* [*isp-1(-)*] animals ( $n = 2$ ). **B-D.** *mon-2* RNAi decreased GFP levels in *mon-2::gfp* transgenic animals. The assay was used to test the efficiency of *mon-2* RNAi for measurement of *gst-4p::gfp* (**B**), *hsp-6p::gfp* (**C**), and *nhr-57p::gfp* (**D**) levels. **E-F.** *mon-2* RNAi did not affect the expression level of *gst-4p::gfp*, a SKN-1 activity reporter, in WT or *isp-1(-)* animals (**E**); quantification of panel E (**F**) ( $n = 3$ ,  $> 60$  animals). Scale bar: 200  $\mu\text{m}$ . *skn-1* RNAi was used as a positive control. **G-H.** *mon-2* RNAi did not change the expression of *hsp-6p::gfp*, a mitochondrial unfolded protein response (UPR<sup>mt</sup>) reporter, in WT or *isp-1(-)* animals (**G**); quantification of panel G (**H**) ( $n = 3$ ,  $> 60$  animals). Scale bar: 200  $\mu\text{m}$ . Error bars represent the standard error of the mean (s.e.m.) ( $*p < 0.05$  and  $***p < 0.001$ ; two-tailed Student's *t*-test). *atfs-1* RNAi was used as a positive control. **I-J.** *mon-2* RNAi did not alter the expression of *nhr-57p::gfp*, a HIF-1 activity reporter, in WT or *isp-1(-)* animals (**I**); quantification of panel I (**J**) ( $n = 3$ ,  $> 60$  animals). Scale bar: 200  $\mu\text{m}$ . Error bars represent s.e.m. ( $*p < 0.05$  and  $***p < 0.001$ ; two-tailed Student's *t*-test). *hif-1* RNAi was used as a positive control. **K.** *mon-2* RNAi did not alter the mRNA level of *ftn-1*, a putative CEP-1 transcriptional target, in WT or *isp-1(-)* animals ( $n = 2$ ). **L-M.** *hlh-30* RNAi increased the fluorescence intensity of MON-2::GFP in WT and *isp-1(-)* animals (**L**); quantification of panel L (**M**) ( $n = 3$ ,  $> 49$  animals). Here, the degree of increased MON-2::GFP levels by *isp-1(-)* was relatively low compared to that in Figure 3H-I and 3K. We speculate that the difference between Figure S4L-M and Figures 3H-I and 3K was caused by different food sources; *E. coli* HT115 strain, which is used for RNAi-mediated knockdown, was used for the food source for Figure S4L-M experiments, whereas *E. coli* OP50 strain was used for Figure 3H-I and 3K experiments. Scale bar: 100  $\mu\text{m}$ . Error bars represent s.e.m. ( $*p < 0.05$  and  $***p < 0.001$ ; two-tailed Student's *t*-test). **N.** Knockdown of *MON2* (si*MON2*) did not alter the flux of mRFP-GFP-LC3B in stable HeLa cells under basal or starvation conditions. We tested changes in LC3B, which is a widely and commonly used autophagy marker (77). Scale bars: 10  $\mu\text{m}$ . **O.** The numbers of RFP<sup>+</sup>GFP<sup>+</sup> puncta and RFP<sup>+</sup>GFP<sup>-</sup> puncta in HeLa cells were counted for each cell and analyzed for statistical differences ( $N = 19$ , 20, 17, and 19). Error bars represent s.e.m. (N.S.: not significant, Mann-Whitney test).























|      |        |          |        |             |             |              |              |      |     |    |     |       |            |    |    |              |
|------|--------|----------|--------|-------------|-------------|--------------|--------------|------|-----|----|-----|-------|------------|----|----|--------------|
| 2509 | O18122 | het-1    | 1      | 0.88155592  | 0.79770613  | -0.16220333  | 0.3418811    | 37.2 | 100 | 61 | 125 | 0.003 | NA         | up | NA | NA           |
| 2509 | O18126 | mmab-1   | 0.9979 | 1.2         | 1.411827957 | 0.378511623  | 0.49756429   | 4.7  | 5   | 2  | 5   | 0.004 | 0.3938497  | NA | up | NA           |
| 2504 | O18224 | ntf-9    | 0.9994 | 0.6253682   | 1.488662132 | -0.276840205 | 0.517401355  | 6.5  | 3   | 2  | 3   | 0.002 | NA         | NA | NA | -0.634035597 |
| 2394 | O19232 | C267.3   | 0.999  | 0.12871287  | 0.722222222 | -2.95771765  | 0.469482383  | 17.7 | 2   | 2  | 2   | 0.001 | NA         | NA | NA | NA           |
| 2409 | O19240 | apz-2    | 0.9998 | 0.99303578  | 1.024047839 | -0.00971853  | 0.034263104  | 9.3  | 4   | 2  | 5   | 0.004 | 0.3204351  | NA | NA | NA           |
| 2404 | O19244 | apz-1    | 0.9996 | 0.84324324  | 0.861876719 | -0.24597460  | 0.231623848  | 13.8 | 5   | 2  | 2   | 0.004 | NA         | up | NA | -0.741239678 |
| 2543 | O19253 | qpf-2    | 0.9938 | 0.677419355 | 0.747179359 | 0.746243048  | 0.746243048  | 1.9  | 2   | 2  | 2   | 0.001 | NA         | up | NA | -0.2703378   |
| 1511 | O19257 | C272.4   | 1      | 0.725581395 | 0.660213702 | -0.462770631 | -0.589995014 | 17   | 6   | 6  | 6   | 0.004 | NA         | NA | NA | -0.955162258 |
| 2739 | O19264 | C272.8   | 0.9802 | 0.791878178 | 0.888844268 | -0.336849601 | 0.154171548  | 1.5  | 2   | 2  | 2   | 0.001 | NA         | NA | NA | NA           |
| 1512 | O19266 | acs-15   | 1      | 0.9874117   | 1.131000719 | -0.018376524 | 0.184041335  | 2.3  | 2   | 4  | 4   | 0.002 | NA         | up | NA | 0.31927167   |
| 1513 | O19302 | col-125  | 1      | 0.611764708 | 2.686445013 | -0.708951218 | 1.425698330  | 3.3  | 6   | 4  | 6   | 0.004 | NA         | NA | NA | 2.578025416  |
| 1514 | O19310 | C295.1   | 1      | 0.981132075 | 1.286938476 | -0.027480736 | 0.363941206  | 21.4 | 22  | 19 | 23  | 0.017 | NA         | NA | NA | 0.430761884  |
| 2207 | O19357 | C314.2   | 0.9999 | 0.818753967 | 0.758608684 | -0.292026609 | -0.401999451 | 6.5  | 3   | 3  | 3   | 0.002 | NA         | NA | NA | NA           |
| 1515 | O19359 | C314.2   | 1      | 1.228346458 | 1.240628921 | -0.296717532 | 0.311072825  | 40   | 34  | 18 | 39  | 0.029 | NA         | NA | NA | 0.207311202  |
| 1516 | O19429 | apz-2    | 1      | 0.885891724 | 0.830749716 | -0.157541277 | 0.287534118  | 5.6  | 8   | 11 | 9   | 0.008 | NA         | NA | NA | NA           |
| 1517 | O19421 | C342.2.8 | 1      | 1.544544548 | 1.592529292 | 0.627190736  | 0.945552216  | 32.5 | 75  | 53 | 98  | 0.073 | 0.70530506 | NA | up | -0.097745622 |
| 1518 | O19429 | C342.6.4 | 1      | 1.04        | 1.105864211 | 0.056583528  | 0.144393403  | 4.7  | 4   | 4  | 7   | 0.005 | NA         | NA | NA | 0.564584758  |
| 1516 | O19445 | gm-12    | 1      | 1.098591544 | 1.109577485 | 0.135655099  | 0.150010392  | 17.8 | 8   | 6  | 8   | 0.006 | NA         | up | NA | -0.522770557 |
| 1521 | O19453 | ncp-1    | 1      | 0.975       | 0.834533988 | -0.385525878 | 0.263957443  | 8.5  | 5   | 5  | 5   | 0.004 | NA         | up | NA | 0.105232501  |
| 1528 | O19483 | C25010.8 | 1      | 1.083333333 | 1.600868627 | 0.115472717  | 0.686223898  | 15.7 | 17  | 3  | 3   | 0.003 | NA         | up | NA | -0.380369694 |
| 1524 | O19484 | C35010.1 | 1      | 0.110970131 | 1.75996417  | 0.01815678   | 0.233883665  | 4.5  | 6   | 4  | 6   | 0.004 | 0.4178979  | NA | up | NA           |
| 1525 | O19486 | csq-8    | 1      | 1.2         | 1.317378134 | 0.263034406  | 0.836393933  | 10.5 | 20  | 14 | 22  | 0.016 | 0.8363525  | NA | up | 0.030575028  |
| 1528 | O19483 | C364.4   | 1      | 0.975       | 0.800089798 | -0.038525878 | 0.320268898  | 30   | 49  | 27 | 57  | 0.044 | NA         | NA | NA | NA           |
| 1527 | O19484 | mgp-12.1 | 1      | 0.787817878 | 0.626026091 | -0.343644501 | 0.651527103  | 19.1 | 9   | 1  | 1   | 0.018 | NA         | up | NA |              |











**Table S1B. GO analysis of proteins whose levels are at least 1.5-fold increased or decreased in both *clk-1(qm30)* and *isp-1(qm150)* animals**

**GO terms that are enriched in proteins whose levels are increased in both *clk-1(qm30)* and *isp-1(qm150)* animals**

GO terms with a Benjamini p-value <0.05 are shaded in grey.

| Term                                             | Count | %     | p-value     | Fold Enrich | Benjamini | FDR      |
|--------------------------------------------------|-------|-------|-------------|-------------|-----------|----------|
| oxidation-reduction process                      | 22    | 15.90 | 0.000000013 | 4.5         | 2.30E-06  | 2.20E-06 |
| glycolytic process                               | 6     | 4.30  | 0.0000024   | 26.4        | 2.20E-04  | 2.20E-04 |
| metabolic process                                | 25    | 18.10 | 0.000038    | 2.5         | 1.70E-03  | 1.70E-03 |
| gluconeogenesis                                  | 4     | 2.90  | 0.000027    | 60.4        | 1.70E-03  | 1.60E-03 |
| tricarboxylic acid cycle                         | 4     | 2.90  | 0.0016      | 16.9        | 4.80E-02  | 4.70E-02 |
| nucleobase-containing compound metabolic process | 4     | 2.90  | 0.0016      | 16.9        | 4.80E-02  | 4.70E-02 |
| determination of adult lifespan                  | 19    | 13.80 | 0.0041      | 2.1         | 8.20E-02  | 8.00E-02 |
| cell redox homeostasis                           | 5     | 3.60  | 0.0036      | 7.9         | 8.20E-02  | 8.00E-02 |
| glucose metabolic process                        | 3     | 2.20  | 0.0045      | 28.8        | 8.20E-02  | 8.00E-02 |
| nucleotide phosphorylation                       | 3     | 2.20  | 0.0037      | 31.7        | 8.20E-02  | 8.00E-02 |
| carboxylic acid metabolic process                | 3     | 2.20  | 0.0063      | 24.4        | 1.10E-01  | 1.00E-01 |
| fatty acid metabolic process                     | 4     | 2.90  | 0.0096      | 9           | 1.50E-01  | 1.40E-01 |
| striated muscle myosin thick filament assembly   | 6     | 4.30  | 0.012       | 4.3         | 1.70E-01  | 1.60E-01 |
| carbohydrate metabolic process                   | 6     | 4.30  | 0.016       | 4           | 2.10E-01  | 2.00E-01 |
| cysteine biosynthetic process                    | 2     | 1.40  | 0.046       | 42.3        | 5.60E-01  | 5.40E-01 |
| cysteine biosynthetic process from serine        | 2     | 1.40  | 0.064       | 30.2        | 7.30E-01  | 7.10E-01 |
| stress response to cadmium ion                   | 2     | 1.40  | 0.09        | 21.1        | 9.60E-01  | 9.40E-01 |

**GO terms that are enriched in proteins whose levels are decreased in both *clk-1(qm30)* and *isp-1(qm150)* animals**

| Term                                                                                     | Count | %     | p-value   | Fold Enrich | Benjamini | FDR      |
|------------------------------------------------------------------------------------------|-------|-------|-----------|-------------|-----------|----------|
| ribosome biogenesis                                                                      | 5     | 4.20  | 0.00041   | 14.1        | 1.20E-02  | 1.20E-02 |
| rRNA processing                                                                          | 5     | 4.20  | 0.001     | 11          | 2.60E-02  | 2.60E-02 |
| gamete generation                                                                        | 7     | 5.90  | 0.0002    | 8.2         | 6.90E-03  | 6.70E-03 |
| RNA interference                                                                         | 8     | 6.70  | 0.00019   | 6.6         | 6.90E-03  | 6.70E-03 |
| translation                                                                              | 13    | 10.90 | 0.000001  | 6.2         | 2.00E-04  | 1.90E-04 |
| reproduction                                                                             | 35    | 29.40 | 0.000049  | 2           | 3.40E-03  | 3.30E-03 |
| nematode larval development                                                              | 32    | 26.90 | 0.00011   | 2           | 5.50E-03  | 5.40E-03 |
| embryo development ending in birth or egg hatching                                       | 47    | 39.50 | 0.0000019 | 1.9         | 2.00E-04  | 1.90E-04 |
| hermaphrodite genitalia development                                                      | 14    | 11.80 | 0.0057    | 2.3         | 1.30E-01  | 1.30E-01 |
| flavonoid glucuronidation                                                                | 4     | 3.40  | 0.019     | 7           | 3.50E-01  | 3.40E-01 |
| flavonoid biosynthetic process                                                           | 4     | 3.40  | 0.019     | 7           | 3.50E-01  | 3.40E-01 |
| mature ribosome assembly                                                                 | 2     | 1.70  | 0.024     | 82.5        | 3.50E-01  | 3.40E-01 |
| regulation of translation                                                                | 3     | 2.50  | 0.024     | 12.4        | 3.50E-01  | 3.40E-01 |
| maturation of SSU-rRNA from tricistronic rRNA transcript (SSU-rRNA, 5.8S rRNA, LSU-rRNA) | 3     | 2.50  | 0.024     | 12.4        | 3.50E-01  | 3.40E-01 |
| receptor-mediated endocytosis                                                            | 12    | 10.10 | 0.032     | 2           | 4.30E-01  | 4.20E-01 |
| RNA secondary structure unwinding                                                        | 3     | 2.50  | 0.033     | 10.3        | 4.30E-01  | 4.20E-01 |
| tryptophan catabolic process                                                             | 2     | 1.70  | 0.039     | 49.5        | 4.80E-01  | 4.70E-01 |
| translational initiation                                                                 | 3     | 2.50  | 0.048     | 8.4         | 5.50E-01  | 5.40E-01 |
| ribosomal small subunit biogenesis                                                       | 2     | 1.70  | 0.055     | 35.3        | 5.90E-01  | 5.80E-01 |
| germ cell development                                                                    | 5     | 4.20  | 0.058     | 3.4         | 6.00E-01  | 5.80E-01 |
| collagen and cuticulin-based cuticle development                                         | 4     | 3.40  | 0.062     | 4.4         | 6.10E-01  | 5.90E-01 |
| nuclear-transcribed mRNA catabolic process, exonucleolytic, 3'-5'                        | 2     | 1.70  | 0.07      | 27.5        | 6.50E-01  | 6.40E-01 |
| determination of adult lifespan                                                          | 13    | 10.90 | 0.088     | 1.6         | 7.90E-01  | 7.70E-01 |

**Table S1C. WormCAT analysis of proteins whose levels are at least 1.5-fold increased or decreased in both *clk-1(qm30)* and *isp-1(qm150)* animals**

**Gene set enrichment analysis among proteins whose levels are increased in both *clk-1(qm30)* and *isp-1(qm150)* animals**

| Category        | RGS | AC   | PValue   | Bonferroni |
|-----------------|-----|------|----------|------------|
| Metabolism      | 53  | 1577 | 1.46E-25 | 2.34E-24   |
| Stress response | 19  | 810  | 2.28E-08 | 3.65E-07   |

**Gene set enrichment analysis among proteins whose levels are decreased in both *clk-1(qm30)* and *isp-1(qm150)* animals**

| Category               | RGS | AC   | PValue   | Bonferroni  |
|------------------------|-----|------|----------|-------------|
| Ribosome               | 17  | 244  | 1.54E-15 | 2.61E-14    |
| mRNA functions         | 12  | 390  | 1.08E-07 | 1.84E-06    |
| Metabolism             | 22  | 1577 | 1.11E-06 | 1.89E-05    |
| Extracellular material | 9   | 485  | 0.00017  | 0.002892695 |

**Table S2A. Result of lifespan screen with *isp-1(qm150); ctb-1(qm189)* double mutants treated with 61 RNAi clones targeting genes that encode proteins whose levels were influenced by both *clk-1(qm30)* and *isp-1(qm150)* mutations (related to Figure 2A and Table S1)**

| Strain/treatment                                | Mean lifespan± SEM (days) | 75th percentile | % change <sup>Δ</sup> | Number of animals that died/total | p-value vs. control |
|-------------------------------------------------|---------------------------|-----------------|-----------------------|-----------------------------------|---------------------|
| Wild-type control RNAi                          | 18.6±0.54                 | 22              | 0                     | 98/120                            |                     |
| <i>isp-1(qm150); ctb-1(qm189)</i> control RNAi  | 27.33±0.64                | 32              | +47                   | 87/120                            | <0.0001             |
| Wild-type <i>sodh-1</i> RNAi                    | 15.27±0.53                | 18              | -18                   | 64/120                            | <0.0001             |
| <i>isp-1(qm150); ctb-1(qm189) sodh-1</i> RNAi   | 26.91±0.69                | 32              | -2                    | 86/120                            | 0.9745              |
| Wild-type <i>cul-5</i> RNAi                     | 14.43±0.56                | 16              | -22                   | 55/120                            | <0.0001             |
| <i>isp-1(qm150); ctb-1(qm189) cul-5</i> RNAi    | 25.36±0.72                | 30              | -7                    | 87/120                            | 0.1751              |
| Wild-type <i>thn-1</i> RNAi                     | 17.36±0.62                | 20              | -7                    | 65/120                            | 0.15                |
| <i>isp-1(qm150); ctb-1(qm189) thn-1</i> RNAi    | 23.23±0.6                 | 26              | -15                   | 92/120                            | <0.0001             |
| Wild-type <i>cyp-33C8</i> RNAi                  | 17.93±0.55                | 20              | -4                    | 69/120                            | 0.2294              |
| <i>isp-1(qm150); ctb-1(qm189) cyp-33C8</i> RNAi | 24.39±0.61                | 26              | -11                   | 77/120                            | 0.0015              |
| Wild-type control RNAi                          | 17.98±0.32                | 22              | 0                     | 99/120                            |                     |
| <i>isp-1(qm150); ctb-1(qm189)</i> control RNAi  | 23.67±0.48                | 27              | +32                   | 90/120                            | <0.0001             |
| Wild-type <i>sodh-1</i> RNAi                    | 17.34±0.4                 | 20              | -4                    | 85/120                            | 0.4397              |
| <i>isp-1(qm150); ctb-1(qm189) sodh-1</i> RNAi   | 24.69±0.56                | 27              | +4                    | 77/120                            | 0.1555              |
| Wild-type <i>cul-5</i> RNAi                     | 16.63±0.32                | 20              | -8                    | 76/120                            | 0.0033              |
| <i>isp-1(qm150); ctb-1(qm189) cul-5</i> RNAi    | 22.91±0.55                | 25              | -3                    | 78/120                            | 0.3976              |
| Wild-type <i>thn-1</i> RNAi                     | 16.75±0.41                | 20              | -7                    | 63/90                             | 0.0354              |

|                                                 |            |    |     |         |         |
|-------------------------------------------------|------------|----|-----|---------|---------|
| <i>isp-1(qm150); ctb-1(qm189) thn-1</i> RNAi    | 23.16±0.48 | 25 | -2  | 70/90   | 0.2506  |
| Wild-type <i>cyp-33C8</i> RNAi                  | 16.16±0.43 | 20 | -10 | 77/120  | 0.0052  |
| <i>isp-1(qm150); ctb-1(qm189) cyp-33C8</i> RNAi | 21.51±0.47 | 25 | -9  | 72/120  | 0.0009  |
| Wild-type <i>gfp</i> RNAi                       | 17.32±0.49 | 20 |     | 78/120  |         |
| <i>isp-1(qm150); ctb-1(qm189) gfp</i> RNAi      | 29.20±0.86 | 34 | +69 | 84/120  | <0.0001 |
| Wild-type <i>acs-2</i> RNAi                     | 15.53±0.55 | 18 | -10 | 86/120  | 0.0605  |
| <i>isp-1(qm150); ctb-1(qm189) acs-2</i> RNAi    | 29.07±0.89 | 36 | 0   | 88/120  | 0.9644  |
| Wild-type <i>aldo-1</i> RNAi                    | 15.9±0.4   | 18 | -8  | 91/120  | 0.0286  |
| <i>isp-1(qm150); ctb-1(qm189) aldo1</i> RNAi    | 25.6±0.83  | 30 | -12 | 102/120 | 0.0126  |
| Wild-type <i>mce-1</i> RNAi                     | 17.21±0.58 | 20 | -1  | 75/120  | 0.9414  |
| <i>isp-1(qm150); ctb-1(qm189) mce-1</i> RNAi    | 27.84±0.86 | 34 | -5  | 86/120  | 0.4647  |
| Wild-type <i>sdz-8</i> RNAi                     | 17.25±0.67 | 22 | 0   | 74/120  | 0.6626  |
| <i>isp-1(qm150); ctb-1(qm189) sdz-8</i> RNAi    | 27.17±0.93 | 32 | -7  | 80/120  | 0.158   |
| Wild-type <i>gfp</i> RNAi                       | 16.12±0.39 | 17 |     | 91/120  |         |
| <i>isp-1(qm150); ctb-1(qm189) gfp</i> RNAi      | 26.04±0.71 | 32 | +62 | 55/120  | <0.0001 |
| Wild-type <i>acs-2</i> RNAi                     | 16.52±0.34 | 19 | +2  | 98/120  | 0.545   |
| <i>isp-1(qm150); ctb-1(qm189) acs-2</i> RNAi    | 26.55±0.45 | 29 | +2  | 103/120 | 0.8568  |
| Wild-type <i>aldo-1</i> RNAi                    | 17.64±0.5  | 21 | +9  | 99/120  | 0.0198  |
| <i>isp-1(qm150); ctb-1(qm189) aldo1</i> RNAi    | 25.02±0.47 | 29 | -4  | 96/120  | 0.1095  |
| Wild-type <i>mce-1</i> RNAi                     | 16.79±0.41 | 19 | +4  | 91/120  | 0.3195  |
| <i>isp-1(qm150); ctb-1(qm189) mce-1</i> RNAi    | 26.33±0.52 | 29 | +1  | 74/90   | 0.9172  |
| Wild-type <i>sdz-8</i> RNAi                     | 15.89±0.44 | 19 | -1  | 91/120  | 0.7507  |

|                                                |            |    |     |         |         |
|------------------------------------------------|------------|----|-----|---------|---------|
| <i>isp-1(qm150); ctb-1(qm189) sdz-8</i> RNAi   | 25.97±0.63 | 29 | 0   | 62/90   | 0.8623  |
| Wild-type control RNAi                         | 19.41±0.48 | 22 |     | 68/120  |         |
| <i>isp-1(qm150); ctb-1(qm189)</i> control RNAi | 27.64±0.73 | 34 | +42 | 87/120  | <0.0001 |
| Wild-type <i>nit-1</i> RNAi                    | 19.5±0.57  | 22 | 0   | 67/120  | 0.644   |
| <i>isp-1(qm150); ctb-1(qm189) nit-1</i> RNAi   | 25.34±0.7  | 30 | -8  | 62/90   | 0.0101  |
| Wild-type <i>cdr-4</i> RNAi                    | 17.65±0.51 | 20 | -9  | 53/120  | 0.0269  |
| <i>isp-1(qm150); ctb-1(qm189) cdr-4</i> RNAi   | 27.74±0.63 | 32 | +1  | 70/90   | 0.3322  |
| Wild-type <i>pck-1</i> RNAi                    | 17.80±0.63 | 22 | -8  | 57/90   | 0.6574  |
| <i>isp-1(qm150); ctb-1(qm189) pck-1</i> RNAi   | 27.12±0.67 | 32 | -2  | 62/120  | 0.2007  |
| Wild-type <i>R08E5.3</i> RNAi                  | 19.04±0.58 | 22 | -2  | 66/120  | 0.9963  |
| <i>isp-1(qm150); ctb-1(qm189) R08E5.3</i> RNAi | 27.33±0.92 | 35 | -1  | 77/120  | 0.4162  |
| Wild-type control RNAi                         | 21.71±0.56 | 28 |     | 89/120  |         |
| <i>isp-1(qm150); ctb-1(qm189)</i> control RNAi | 29.29±0.74 | 34 | +35 | 78/120  | <0.0001 |
| Wild-type <i>nit-1</i> RNAi                    | 23.05±0.53 | 28 | +6  | 106/120 | 0.1037  |
| <i>isp-1(qm150); ctb-1(qm189) nit-1</i> RNAi   | 29.31±0.58 | 34 | 0   | 105/120 | 0.6905  |
| Wild-type <i>cdr-4</i> RNAi                    | 21.57±0.52 | 25 | -1  | 85/120  | 0.8427  |
| <i>isp-1(qm150); ctb-1(qm189) cdr-4</i> RNAi   | 30.21±0.62 | 34 | +3  | 83/120  | 0.5305  |
| Wild-type <i>pck-1</i> RNAi                    | 20.86±0.53 | 25 | -4  | 74/120  | 0.1717  |
| <i>isp-1(qm150); ctb-1(qm189) pck-1</i> RNAi   | 28.64±0.63 | 34 | -2  | 70/120  | 0.2733  |
| Wild-type <i>R08E5.3</i> RNAi                  | 20.93±0.59 | 28 | -4  | 101/120 | 0.4159  |
| <i>isp-1(qm150); ctb-1(qm189) R08E5.3</i> RNAi | 27.87±0.49 | 30 | -5  | 103/120 | 0.0024  |

|                                                    |            |    |     |        |         |
|----------------------------------------------------|------------|----|-----|--------|---------|
| Wild-type <i>gfp</i> RNAi                          | 20.68±0.67 | 24 |     | 40/120 |         |
| <i>isp-1(qm150); ctb-1(qm189) gfp</i> RNAi         | 31.25±0.98 | 39 | +51 | 84/120 | <0.0001 |
| Wild-type <i>tbb-6</i> RNAi                        | 19.08±0.62 | 22 | -8  | 47/120 | 0.0601  |
| <i>isp-1(qm150); ctb-1(qm189) tbb-6</i> RNAi       | 31.91±1.06 | 39 | +2  | 70/120 | 0.7561  |
| Wild-type <i>gpd-2/gpd-3</i> RNAi                  | 19.24±0.6  | 22 | -7  | 55/120 | 0.1672  |
| <i>isp-1(qm150); ctb-1(qm189) gpd-2/gpd-3</i> RNAi | 26.21±0.98 | 33 | -16 | 77/120 | 0.0006  |
| Wild-type <i>har-1</i> RNAi                        | 22.59±0.87 | 26 | +9  | 39/120 | 0.0283  |
| <i>isp-1(qm150); ctb-1(qm189) har-1</i> RNAi       | 32.06±1.00 | 37 | +3  | 65/120 | 0.859   |
| Wild-type <i>mon-2</i> RNAi                        | 19.61±0.64 | 22 | -5  | 31/90  | 0.1805  |
| <i>isp-1(qm150); ctb-1(qm189) mon-2</i> RNAi       | 27.18±0.74 | 33 | -13 | 80/120 | 0.0001  |
| Wild-type <i>gfp</i> RNAi                          | 17.74±0.39 | 21 |     | 70/120 |         |
| <i>isp-1(qm150); ctb-1(qm189) gfp</i> RNAi         | 30.21±0.86 | 38 | +70 | 73/120 | <0.0001 |
| Wild-type <i>tbb-6</i> RNAi                        | 19.3±0.44  | 21 | +9  | 64/120 | 0.0081  |
| <i>isp-1(qm150); ctb-1(qm189) tbb-6</i> RNAi       | 30.34±1.18 | 38 | 0   | 53/120 | 0.5876  |
| Wild-type <i>gpd-2/gpd-3</i> RNAi                  | 19.29±0.37 | 23 | +9  | 80/120 | 0.0036  |
| <i>isp-1(qm150); ctb-1(qm189) gpd-2/gpd-3</i> RNAi | 25.97±0.85 | 32 | -14 | 94/120 | 0.0013  |
| Wild-type <i>har-1</i> RNAi                        | 18.57±0.43 | 21 | +5  | 78/120 | 0.1394  |
| <i>isp-1(qm150); ctb-1(qm189) har-1</i> RNAi       | 30.04±0.84 | 38 | -1  | 81/120 | 0.9328  |
| Wild-type <i>mon-2</i> RNAi                        | 17.72±0.38 | 21 | 0   | 76/120 | 0.9898  |
| <i>isp-1(qm150); ctb-1(qm189) mon-2</i> RNAi       | 25.8±0.79  | 32 | -15 | 63/120 | <0.0001 |
| Wild-type control RNAi                             | 20.52±0.64 | 26 |     | 83/120 |         |

|                                                |            |    |     |        |         |
|------------------------------------------------|------------|----|-----|--------|---------|
| <i>isp-1(qm150); ctb-1(qm189)</i> control RNAi | 29.07±0.88 | 35 | +42 | 87/120 | <0.0001 |
| Wild-type <i>rde-4</i> RNAi                    | 21.93±0.67 | 26 | +7  | 83/120 | 0.1169  |
| <i>isp-1(qm150); ctb-1(qm189) rde-4</i> RNAi   | 30.49±1.06 | 39 | +5  | 74/120 | <0.0001 |
| Wild-type <i>ugt-26</i> RNAi                   | 21.36±0.65 | 26 | +4  | 81/120 | 0.4103  |
| <i>isp-1(qm150); ctb-1(qm189) ugt-26</i> RNAi  | 25.32±0.88 | 31 | -13 | 72/120 | <0.0001 |
| Wild-type <i>C46C2.2</i> RNAi                  | 21.73±0.67 | 26 | +6  | 70/120 | 0.2551  |
| <i>isp-1(qm150); ctb-1(qm189) C46C2.2</i> RNAi | 28.72±0.93 | 35 | -1  | 83/120 | <0.0001 |
| Wild-type <i>C50F4.1</i> RNAi                  | 20.33±0.66 | 24 | -1  | 71/120 | 0.8316  |
| <i>isp-1(qm150); ctb-1(qm189) C50F4.1</i> RNAi | 27.76±0.95 | 35 | -5  | 78/120 | <0.0001 |
| Wild-type control RNAi                         | 20.17±0.6  | 23 |     | 64/120 |         |
| <i>isp-1(qm150); ctb-1(qm189)</i> control RNAi | 35.03±1.17 | 41 | +74 | 62/90  | <0.0001 |
| Wild-type <i>rde-4</i> RNAi                    | 21.42±0.7  | 26 | +6  | 66/120 | 0.1278  |
| <i>isp-1(qm150); ctb-1(qm189) rde-4</i> RNAi   | 35.61±0.94 | 41 | +2  | 77/120 | 0.8821  |
| Wild-type <i>ugt-26</i> RNAi                   | 20.2±0.74  | 26 | 0   | 56/120 | 0.8235  |
| <i>isp-1(qm150); ctb-1(qm189) ugt-26</i> RNAi  | 30.22±1.09 | 35 | -14 | 54/90  | 0.0046  |
| Wild-type <i>C46C2.2</i> RNAi                  | 20.03±0.67 | 23 | -1  | 50/120 | 0.8793  |
| <i>isp-1(qm150); ctb-1(qm189) C46C2.2</i> RNAi | 33.27±1.01 | 39 | -5  | 59/90  | 0.2273  |
| Wild-type <i>C50F4.1</i> RNAi                  | 19.87±0.72 | 23 | -1  | 49/120 | 0.8501  |

|                                                 |            |    |     |         |         |
|-------------------------------------------------|------------|----|-----|---------|---------|
| <i>isp-1(qm150); ctb-1(qm189) C50F4.1</i> RNAi  | 31.28±0.96 | 37 | -11 | 85/120  | 0.0249  |
| Wild-type <i>gfp</i> RNAi                       | 19.08±0.46 | 22 |     | 82/120  |         |
| <i>isp-1(qm150); ctb-1(qm189) gfp</i> RNAi      | 29.7±0.84  | 36 | +56 | 102/120 | <0.0001 |
| Wild-type <i>pud-1.2</i> RNAi                   | 20.68±0.44 | 24 | +8  | 98/120  | 0.0083  |
| <i>isp-1(qm150); ctb-1(qm189) pud-1.2</i> RNAi  | 29.83±1.01 | 40 | 0   | 96/120  | 0.3181  |
| Wild-type <i>csr-1</i> RNAi                     | 17.72±0.49 | 20 | -7  | 78/120  | 0.061   |
| <i>isp-1(qm150); ctb-1(qm189) csr-1</i> RNAi    | 26.79±0.85 | 32 | -10 | 92/120  | 0.0184  |
| Wild-type <i>gfp</i> RNAi                       | 20.62±0.48 | 23 |     | 86/120  |         |
| <i>isp-1(qm150); ctb-1(qm189) gfp</i> RNAi      | 27.96±0.81 | 33 | +36 | 75/120  | <0.0001 |
| Wild-type <i>pud-1.2</i> RNAi                   | 21.66±0.43 | 25 | +5  | 94/120  | 0.1644  |
| <i>isp-1(qm150); ctb-1(qm189) pud-1.2</i> RNAi  | 28.84±0.79 | 35 | +3  | 102/120 | 0.3956  |
| Wild-type <i>csr-1</i> RNAi                     | 17.06±0.56 | 19 | -17 | 57/120  | <0.0001 |
| <i>isp-1(qm150); ctb-1(qm189) csr-1</i> RNAi    | 27.16±0.77 | 31 | -3  | 85/120  | 0.4779  |
| Wild-type control RNAi                          | 20.31±0.56 | 23 |     | 81/120  |         |
| <i>isp-1(qm150); ctb-1(qm189) control</i> RNAi  | 31.78±1.06 | 40 | +56 | 82/120  | <0.0001 |
| Wild-type <i>F22E5.1</i> RNAi                   | 20.83±0.55 | 25 | +3  | 78/120  | 0.5946  |
| <i>isp-1(qm150); ctb-1(qm189) F22E5.1</i> RNAi  | 30.84±0.95 | 36 | -3  | 87/120  | 0.4458  |
| Wild-type <i>F42A10.7</i> RNAi                  | 22.57±0.52 | 27 | +11 | 95/120  | 0.0115  |
| <i>isp-1(qm150); ctb-1(qm189) F42A10.7</i> RNAi | 35.92±0.92 | 42 | +13 | 85/120  | 0.0223  |
| Wild-type <i>cey-2</i> RNAi                     | 22.12±0.53 | 27 | +9  | 88/120  | 0.0527  |
| <i>isp-1(qm150); ctb-1(qm189) cey-2</i> RNAi    | 34.16±1.12 | 44 | +7  | 97/120  | 0.0796  |

|                                                  |            |    |     |         |         |
|--------------------------------------------------|------------|----|-----|---------|---------|
| Wild-type <i>K01D12.15</i> RNAi                  | 21.17±0.52 | 25 | +4  | 67/120  | 0.3589  |
| <i>isp-1(qm150); ctb-1(qm189) K01D12.15</i> RNAi | 31.77±0.88 | 38 | 0   | 82/120  | 0.4865  |
| Wild-type <i>T05E12.6</i> RNAi                   | 23.04±0.61 | 29 | +13 | 90/120  | 0.0009  |
| <i>isp-1(qm150); ctb-1(qm189) T05E12.6</i> RNAi  | 36.13±1.14 | 45 | +14 | 91/120  | 0.002   |
| Wild-type <i>T17H7.1</i> RNAi                    | 21.42±0.6  | 24 | +5  | 71/120  | 0.1746  |
| <i>isp-1(qm150); ctb-1(qm189) T17H7.1</i> RNAi   | 32.57±1.24 | 40 | +2  | 80/120  | 0.4036  |
| Wild-type <i>ant-1.2</i> RNAi                    | 20.65±0.59 | 24 | +2  | 81/120  | 0.5593  |
| <i>isp-1(qm150); ctb-1(qm189) ant-1.2</i> RNAi   | 32.38±1.31 | 43 | +2  | 71/120  | 0.4805  |
| Wild-type <i>Y38C1AB.3</i> RNAi                  | 24.31±0.54 | 29 | +20 | 77/120  | <0.0001 |
| <i>isp-1(qm150); ctb-1(qm189) Y38C1AB.3</i> RNAi | 34.4±1.46  | 47 | +8  | 80/120  | 0.0701  |
| Wild-type control RNAi                           | 17.42±0.37 | 19 |     | 76/175  |         |
| <i>isp-1(qm150); ctb-1(qm189) control</i> RNAi   | 30.97±0.69 | 36 | +78 | 91/140  | <0.0001 |
| Wild-type <i>F22E5.1</i> RNAi                    | 17.47±0.4  | 19 | 0   | 83/175  | 0.7148  |
| <i>isp-1(qm150); ctb-1(qm189) F22E5.1</i> RNAi   | 30.1±0.96  | 33 | -3  | 69/140  | 0.7992  |
| Wild-type <i>F42A10.7</i> RNAi                   | 17.03±0.55 | 19 | -2  | 50/105  | 0.8114  |
| <i>isp-1(qm150); ctb-1(qm189) F42A10.7</i> RNAi  | 27.77±0.77 | 30 | -10 | 75/140  | 0.0045  |
| Wild-type <i>cey-2</i> RNAi                      | 17.93±0.4  | 21 | +3  | 85/175  | 0.2392  |
| <i>isp-1(qm150); ctb-1(qm189) cey-2</i> RNAi     | 29.81±0.64 | 33 | -4  | 113/140 | 0.2969  |

|                                                  |            |    |     |         |         |
|--------------------------------------------------|------------|----|-----|---------|---------|
| Wild-type <i>K01D12.15</i> RNAi                  | 19.2±0.51  | 23 | +10 | 91/175  | 0.0018  |
| <i>isp-1(qm150); ctb-1(qm189) K01D12.15</i> RNAi | 28.51±0.69 | 33 | -8  | 59/140  | 0.008   |
| Wild-type <i>T05E12.6</i> RNAi                   | 19.07±0.47 | 22 | +9  | 61/140  | 0.005   |
| <i>isp-1(qm150); ctb-1(qm189) T05E12.6</i> RNAi  | 32.45±0.87 | 38 | +5  | 87/140  | 0.0926  |
| Wild-type <i>T17H7.1</i> RNAi                    | 19.74±0.66 | 24 | +13 | 48/105  | 0.0009  |
| <i>isp-1(qm150); ctb-1(qm189) T17H7.1</i> RNAi   | 31.72±1.12 | 38 | +2  | 60/140  | 0.2411  |
| Wild-type <i>ant-1.2</i> RNAi                    | 18.28±0.72 | 22 | +5  | 28/140  | 0.3233  |
| <i>isp-1(qm150); ctb-1(qm189) ant-1.2</i> RNAi   | 32.74±0.86 | 38 | +6  | 57/140  | 0.1872  |
| Wild-type <i>Y38C1AB.3</i> RNAi                  | 19.07±0.78 | 22 | +9  | 36/140  | 0.0186  |
| <i>isp-1(qm150); ctb-1(qm189) Y38C1AB.3</i> RNAi | 34.26±0.88 | 41 | +11 | 61/125  | 0.0153  |
| Wild-type control RNAi                           | 21.21±0.51 | 25 |     | 98/120  |         |
| <i>isp-1(qm150); ctb-1(qm189) control</i> RNAi   | 30.03±0.91 | 36 | +42 | 96/120  | <0.0001 |
| Wild-type <i>dhs-4</i> RNAi                      | 19.99±0.47 | 23 | -6  | 105/121 | 0.0554  |
| <i>isp-1(qm150); ctb-1(qm189) dhs-4</i> RNAi     | 29.41±0.84 | 34 | -2  | 97/120  | 0.4159  |
| Wild-type <i>pgp-6</i> RNAi                      | 19.58±0.55 | 23 | -8  | 84/120  | 0.0259  |
| <i>isp-1(qm150); ctb-1(qm189) pgp-6</i> RNAi     | 26.85±1.07 | 30 | -11 | 57/90   | 0.0247  |
| Wild-type <i>gld-1</i> RNAi                      | 14.27±0.2  | 18 | -33 | 105/120 | <0.0001 |
| <i>isp-1(qm150); ctb-1(qm189) gld-1</i> RNAi     | 20.8±0.26  | 23 | -31 | 113/122 | <0.0001 |
| Wild-type <i>ssp-9</i> RNAi                      | 20.53±0.47 | 25 | -3  | 92/120  | 0.2935  |

|                                                 |            |    |     |         |         |
|-------------------------------------------------|------------|----|-----|---------|---------|
| <i>isp-1(qm150); ctb-1(qm189) ssp-9 RNAi</i>    | 25.27±0.78 | 31 | -16 | 121/180 | 0.0004  |
| Wild-type control RNAi                          | 18.92±0.53 | 24 |     | 92/120  |         |
| <i>isp-1(qm150); ctb-1(qm189) control RNAi</i>  | 30.79±0.98 | 39 | +63 | 82/120  | <0.0001 |
| Wild-type <i>dhs-4</i> RNAi                     | 20.79±0.53 | 24 | +10 | 84/120  | 0.0278  |
| <i>isp-1(qm150); ctb-1(qm189) dhs-4 RNAi</i>    | 29.99±0.87 | 34 | -3  | 69/90   | 0.1239  |
| Wild-type <i>pgp-6</i> RNAi                     | 20.53±0.51 | 24 | +9  | 72/120  | 0.1407  |
| <i>isp-1(qm150); ctb-1(qm189) pgp-6 RNAi</i>    | 28.01±1.25 | 34 | -11 | 30/120  | 0.0137  |
| Wild-type <i>gld-1</i> RNAi                     | 12.56±0.24 | 16 | -34 | 102/120 | <0.0001 |
| <i>isp-1(qm150); ctb-1(qm189) gld-1 RNAi</i>    | 19.18±0.21 | 22 | -38 | 106/120 | <0.0001 |
| Wild-type <i>ssp-9</i> RNAi                     | 21.1±0.5   | 24 | +12 | 94/120  | 0.0081  |
| <i>isp-1(qm150); ctb-1(qm189) ssp-9 RNAi</i>    | 33.05±0.96 | 39 | +7  | 79/120  | 0.1261  |
| Wild-type control RNAi                          | 20.37±0.49 | 25 |     | 118/140 |         |
| <i>isp-1(qm150); ctb-1(qm189) control RNAi</i>  | 27.3±1.04  | 34 | +34 | 83/120  | <0.0001 |
| Wild-type <i>cyp-14A1</i> RNAi                  | 21.01±0.44 | 25 | +3  | 106/140 | 0.8647  |
| <i>isp-1(qm150); ctb-1(qm189) cyp-14A1 RNAi</i> | 27.73±0.9  | 34 | +2  | 84/120  | 0.9717  |
| Wild-type <i>F48D6.4</i> RNAi                   | 20.77±0.5  | 25 | +2  | 109/140 | 0.5233  |
| <i>isp-1(qm150); ctb-1(qm189) F48D6.4 RNAi</i>  | 23.75±1.06 | 29 | -13 | 66/120  | 0.0362  |
| Wild-type <i>ugt-61</i> RNAi                    | 20.49±0.51 | 25 | +1  | 113/140 | 0.6781  |
| <i>isp-1(qm150); ctb-1(qm189) ugt-61 RNAi</i>   | 24.51±0.94 | 29 | -10 | 82/120  | 0.0846  |
| Wild-type control RNAi                          | 19.62±0.35 | 23 |     | 99/120  |         |

|                                                 |            |    |     |         |         |
|-------------------------------------------------|------------|----|-----|---------|---------|
| <i>isp-1(qm150); ctb-1(qm189) control RNAi</i>  | 29.84±1.1  | 38 | +52 | 66/120  | <0.0001 |
| Wild-type <i>cyp-14A1</i> RNAi                  | 19.99±0.3  | 23 | +2  | 121/160 | 0.6069  |
| <i>isp-1(qm150); ctb-1(qm189) cyp-14A1</i> RNAi | 26.5±1.12  | 34 | -11 | 59/120  | 0.0127  |
| Wild-type <i>F48D6.4</i> RNAi                   | 21.77±0.3  | 25 | +11 | 116/160 | <0.0001 |
| <i>isp-1(qm150); ctb-1(qm189) F48D6.4</i> RNAi  | 27.89±0.8  | 34 | -7  | 77/120  | 0.0148  |
| Wild-type <i>ugt-61</i> RNAi                    | 21.17±0.39 | 23 | +8  | 95/120  | 0.0005  |
| <i>isp-1(qm150); ctb-1(qm189) ugt-61</i> RNAi   | 25.9±0.92  | 34 | -13 | 68/120  | 0.001   |
| Wild-type control RNAi                          | 18.75±0.38 | 21 |     | 89/120  |         |
| <i>isp-1(qm150); ctb-1(qm189) control</i> RNAi  | 24.96±0.74 | 28 | +33 | 63/110  | <0.0001 |
| Wild-type <i>col-175</i> RNAi                   | 16.92±0.4  | 19 | -10 | 88/120  | 0.0015  |
| <i>isp-1(qm150); ctb-1(qm189) col-175</i> RNAi  | 26.52±0.54 | 30 | +6  | 71/120  | 0.2395  |
| Wild-type <i>bam-2</i> RNAi                     | 15.83±0.38 | 19 | -16 | 85/120  | <0.0001 |
| <i>isp-1(qm150); ctb-1(qm189) bam-2</i> RNAi    | 23.63±0.82 | 28 | -5  | 66/120  | 0.1103  |
| Wild-type <i>C09B9.3</i> RNAi                   | 17.84±0.39 | 21 | -5  | 85/120  | 0.145   |
| <i>isp-1(qm150); ctb-1(qm189) C09B9.3</i> RNAi  | 27.27±0.62 | 33 | +9  | 73/120  | 0.0177  |
| Wild-type <i>E04D5.1</i> RNAi                   | 18.55±0.39 | 21 | -1  | 82/120  | 0.6835  |
| <i>isp-1(qm150); ctb-1(qm189) E04D5.1</i> RNAi  | 24.31±0.78 | 28 | -3  | 83/120  | 0.7164  |

|                                                  |            |    |     |        |         |
|--------------------------------------------------|------------|----|-----|--------|---------|
| Wild-type control RNAi                           | 19.48±0.44 | 21 |     | 91/120 |         |
| <i>isp-1(qm150); ctb-1(qm189)</i> control RNAi   | 27.7±0.88  | 32 | +42 | 56/120 | <0.0001 |
| Wild-type <i>col-175</i> RNAi                    | 18.98±0.48 | 21 | -3  | 94/120 | 0.7309  |
| <i>isp-1(qm150); ctb-1(qm189) col-175</i> RNAi   | 27.51±0.73 | 32 | -1  | 72/120 | 0.6742  |
| Wild-type <i>bam-2</i> RNAi                      | 19.7±0.42  | 21 | +1  | 74/90  | 0.9542  |
| <i>isp-1(qm150); ctb-1(qm189) bam-2</i> RNAi     | 24.34±0.82 | 30 | -12 | 62/120 | 0.0048  |
| Wild-type <i>C09B9.3</i> RNAi                    | 19.14±0.45 | 21 | -2  | 94/120 | 0.7075  |
| <i>isp-1(qm150); ctb-1(qm189) C09B9.3</i> RNAi   | 25.1±0.76  | 30 | -9  | 71/120 | 0.0259  |
| Wild-type <i>E04D5.1</i> RNAi                    | 18.73±0.57 | 21 | -4  | 89/120 | 0.767   |
| <i>isp-1(qm150); ctb-1(qm189) E04D5.1</i> RNAi   | 23.52±0.81 | 28 | -15 | 67/120 | 0.0009  |
| Wild-type control RNAi                           | 19.83±0.39 | 23 |     | 81/120 |         |
| <i>isp-1(qm150); ctb-1(qm189)</i> control RNAi   | 22.68±0.75 | 26 | +14 | 88/118 | 0.0002  |
| Wild-type <i>C01B4.6</i> RNAi                    | 18.88±0.46 | 23 | -5  | 79/120 | 0.2318  |
| <i>isp-1(qm150); ctb-1(qm189) C01B4.6</i> RNAi   | 24.73±0.9  | 32 | +9  | 67/120 | 0.103   |
| Wild-type <i>gei-7</i> RNAi                      | 18.01±0.28 | 19 | -9  | 89/120 | 0.0001  |
| <i>isp-1(qm150); ctb-1(qm189) gei-7</i> RNAi     | 22.67±0.54 | 26 | 0   | 95/120 | 0.6092  |
| Wild-type <i>Y57G11A.2</i> RNAi                  | 20.67±0.44 | 25 | +4  | 85/120 | 0.0863  |
| <i>isp-1(qm150); ctb-1(qm189) Y57G11A.2</i> RNAi | 26.53±0.83 | 32 | +17 | 75/120 | 0.0013  |
| Wild-type <i>cdr-2</i> RNAi                      | 18.16±0.36 | 21 | -8  | 83/120 | 0.002   |

|                                                  |            |    |     |         |         |
|--------------------------------------------------|------------|----|-----|---------|---------|
| <i>isp-1(qm150); ctb-1(qm189) cdr-2</i> RNAi     | 22.4±0.8   | 26 | -1  | 79/120  | 0.9302  |
| Wild-type control RNAi                           | 19.12±0.59 | 22 |     | 67/90   |         |
| <i>isp-1(qm150); ctb-1(qm189)</i> control RNAi   | 25.9±0.78  | 32 | +35 | 71/120  | <0.0001 |
| Wild-type <i>C01B4.6</i> RNAi                    | 20.05±0.6  | 27 | +5  | 90/120  | 0.0941  |
| <i>isp-1(qm150); ctb-1(qm189) C01B4.6</i> RNAi   | 24.99±0.82 | 30 | -4  | 68/120  | 0.4949  |
| Wild-type <i>gei-7</i> RNAi                      | 19.18±0.56 | 22 | 0   | 73/90   | 0.8648  |
| <i>isp-1(qm150); ctb-1(qm189) gei-7</i> RNAi     | 25.94±0.71 | 30 | 0   | 84/120  | 0.9752  |
| Wild-type <i>Y57G11A.2</i> RNAi                  | 20.04±0.54 | 24 | +5  | 90/120  | 0.2041  |
| <i>isp-1(qm150); ctb-1(qm189) Y57G11A.2</i> RNAi | 24.34±0.69 | 30 | -6  | 75/120  | 0.0814  |
| Wild-type <i>cdr-2</i> RNAi                      | 20.01±0.5  | 24 | +5  | 103/120 | 0.2044  |
| <i>isp-1(qm150); ctb-1(qm189) cdr-2</i> RNAi     | 24.8±0.9   | 30 | -4  | 52/120  | 0.3253  |
| Wild-type control RNAi                           | 21.02±0.52 | 26 |     | 99/120  |         |
| <i>isp-1(qm150); ctb-1(qm189)</i> control RNAi   | 28.92±0.84 | 34 | +38 | 94/120  | <0.0001 |
| Wild-type <i>col-88</i> RNAi                     | 20.6±0.55  | 24 | -2  | 84/120  | 0.5456  |
| <i>isp-1(qm150); ctb-1(qm189) col-88</i> RNAi    | 29.47±1.02 | 36 | +2  | 78/120  | 0.4705  |
| Wild-type <i>F57H12.6</i> RNAi                   | 21.79±0.57 | 26 | +4  | 85/120  | 0.3007  |
| <i>isp-1(qm150); ctb-1(qm189) F57H12.6</i> RNAi  | 31.24±0.76 | 38 | +8  | 96/120  | 0.1263  |
| Wild-type <i>Y38H8A.3</i> RNAi                   | 20.77±0.6  | 26 | -1  | 96/120  | 0.9855  |
| <i>isp-1(qm150); ctb-1(qm189) Y38H8A.3</i> RNAi  | 26.81±0.91 | 34 | -7  | 75/120  | 0.0528  |

|                                                 |            |    |     |         |         |
|-------------------------------------------------|------------|----|-----|---------|---------|
| Wild-type control RNAi                          | 22.01±0.6  | 26 |     | 76/120  |         |
| <i>isp-1(qm150); ctb-1(qm189)</i> control RNAi  | 30.73±1.24 | 37 | +40 | 52/90   | <0.0001 |
| Wild-type <i>col-88</i> RNAi                    | 22.01±0.56 | 26 | 0   | 82/120  | 0.9224  |
| <i>isp-1(qm150); ctb-1(qm189) col-88</i> RNAi   | 32.19±0.92 | 37 | +5  | 83/120  | 0.5245  |
| Wild-type <i>F57H12.6</i> RNAi                  | 21.26±0.58 | 26 | -3  | 66/120  | 0.3443  |
| <i>isp-1(qm150); ctb-1(qm189) F57H12.6</i> RNAi | 34.37±1.09 | 45 | +12 | 80/120  | 0.0327  |
| Wild-type <i>Y38H8A.3</i> RNAi                  | 22.66±0.53 | 26 | +3  | 88/120  | 0.4666  |
| <i>isp-1(qm150); ctb-1(qm189) Y38H8A.3</i> RNAi | 28.76±0.99 | 35 | -6  | 92/120  | 0.3232  |
| Wild-type control RNAi                          | 21.87±0.53 | 26 |     | 98/120  |         |
| <i>isp-1(qm150); ctb-1(qm189)</i> control RNAi  | 28.17±0.96 | 36 | +29 | 90/120  | <0.0001 |
| Wild-type <i>C35B1.5</i> RNAi                   | 21.61±0.52 | 26 | -1  | 86/120  | 0.4338  |
| <i>isp-1(qm150); ctb-1(qm189) C35B1.5</i> RNAi  | 29.11±0.84 | 36 | +3  | 103/120 | 0.9565  |
| Wild-type <i>C44B7.10</i> RNAi                  | 19.35±0.46 | 22 | -12 | 100/120 | 0.0001  |
| <i>isp-1(qm150); ctb-1(qm189) C44B7.10</i> RNAi | 22.75±0.91 | 28 | -19 | 84/120  | 0.0002  |
| Wild-type <i>ugt-29</i> RNAi                    | 21.27±0.5  | 26 | -3  | 94/120  | 0.3054  |
| <i>isp-1(qm150); ctb-1(qm189) ugt-29</i> RNAi   | 27.84±0.9  | 36 | -1  | 110/120 | 0.8317  |
| Wild-type control RNAi                          | 21.39±0.55 | 25 |     | 73/120  |         |

|                                                           |            |    |     |         |         |
|-----------------------------------------------------------|------------|----|-----|---------|---------|
| <i>isp-1(qm150); ctb-1(qm189)</i> control RNAi            | 29.04±0.9  | 36 | +36 | 101/120 | <0.0001 |
| Wild-type <i>C35B1.5</i> RNAi                             | 19.69±0.58 | 25 | -8  | 50/90   | 0.0345  |
| <i>isp-1(qm150); ctb-1(qm189)</i> <i>C35B1.5</i> RNAi     | 33.88±0.9  | 42 | +17 | 103/120 | 0.0001  |
| Wild-type <i>C44B7.10</i> RNAi                            | 20.19±0.55 | 25 | -6  | 63/120  | 0.0995  |
| <i>isp-1(qm150); ctb-1(qm189)</i> <i>C44B7.10</i> RNAi    | 26.09±0.81 | 33 | -10 | 91/120  | 0.0063  |
| Wild-type <i>ugt-29</i> RNAi                              | 21.03±0.6  | 25 | -2  | 90/120  | 0.8898  |
| <i>isp-1(qm150); ctb-1(qm189)</i> <i>ugt-29</i> RNAi      | 28.65±0.92 | 36 | -1  | 108/120 | 0.9932  |
| Wild-type control RNAi                                    | 21.37±0.6  | 27 |     | 87/120  |         |
| <i>isp-1(qm150); ctb-1(qm189)</i> control RNAi            | 32.15±1.2  | 41 | +50 | 57/90   | <0.0001 |
| Wild-type <i>alh-4/alh-5</i> RNAi                         | 23.76±0.58 | 27 | +11 | 90/120  | 0.0066  |
| <i>isp-1(qm150); ctb-1(qm189)</i> <i>alh-4/alh-5</i> RNAi | 28.21±0.89 | 32 | -12 | 57/90   | 0.0007  |
| Wild-type <i>ddo-2</i> RNAi                               | 21.9±0.63  | 27 | +2  | 79/120  | 0.5151  |
| <i>isp-1(qm150); ctb-1(qm189)</i> <i>ddo-2</i> RNAi       | 31.8±0.97  | 39 | -1  | 72/120  | 0.6098  |
| Wild-type <i>F08A8.2</i> RNAi                             | 22.05±0.68 | 27 | +3  | 83/120  | 0.3365  |
| <i>isp-1(qm150); ctb-1(qm189)</i> <i>F08A8.2</i> RNAi     | 31.45±0.87 | 39 | -2  | 95/120  | 0.4786  |
| Wild-type <i>T22B3.2</i> RNAi                             | 21.65±0.63 | 27 | +1  | 82/120  | 0.7008  |
| <i>isp-1(qm150); ctb-1(qm189)</i> <i>T22B3.2</i> RNAi     | 30.03±1.19 | 39 | -7  | 64/90   | 0.3168  |

|                                                    |            |    |     |         |         |
|----------------------------------------------------|------------|----|-----|---------|---------|
| Wild-type control RNAi                             | 22.66±0.4  | 27 |     | 80/140  |         |
| <i>isp-1(qm150); ctb-1(qm189)</i> control RNAi     | 33.17±0.9  | 40 | +46 | 89/140  | <0.0001 |
| Wild-type <i>alh-4/alh-5</i> RNAi                  | 23.44±0.48 | 27 | +3  | 83/140  | 0.095   |
| <i>isp-1(qm150); ctb-1(qm189) alh-4/alh-5</i> RNAi | 29.07±0.89 | 34 | -12 | 61/140  | 0.0008  |
| Wild-type <i>ddo-2</i> RNAi                        | 21.71±0.56 | 24 | -4  | 49/105  | 0.2703  |
| <i>isp-1(qm150); ctb-1(qm189) ddo-2</i> RNAi       | 31.75±0.93 | 37 | -4  | 75/140  | 0.2078  |
| Wild-type <i>F08A8.2</i> RNAi                      | 20.94±0.56 | 24 | -8  | 72/140  | 0.0459  |
| <i>isp-1(qm150); ctb-1(qm189) F08A8.2</i> RNAi     | 33.61±1.09 | 40 | +1  | 71/105  | 0.5814  |
| Wild-type <i>T22B3.2</i> RNAi                      | 22.67±0.49 | 24 | 0   | 76/140  | 0.7494  |
| <i>isp-1(qm150); ctb-1(qm189) T22B3.2</i> RNAi     | 31.81±1.02 | 40 | -4  | 68/105  | 0.2407  |
| Wild-type control RNAi                             | 21.28±0.64 | 27 |     | 93/120  |         |
| <i>isp-1(qm150); ctb-1(qm189)</i> control RNAi     | 32.94±1.34 | 40 | +55 | 82/120  | <0.0001 |
| Wild-type <i>haf-3</i> RNAi                        | 18.72±0.52 | 23 | -12 | 111/90  | 0.0002  |
| <i>isp-1(qm150); ctb-1(qm189) haf-3</i> RNAi       | 35.23±1.45 | 44 | +7  | 99/120  | 0.2056  |
| Wild-type <i>patr-1</i> RNAi                       | 20.73±0.54 | 25 | -3  | 87/120  | 0.2395  |
| <i>isp-1(qm150); ctb-1(qm189) patr-1</i> RNAi      | 24.2±0.79  | 30 | -27 | 74/120  | <0.0001 |
| Wild-type <i>ugt-62</i> RNAi                       | 24.24±0.56 | 27 | +14 | 67/120  | 0.0068  |
| <i>isp-1(qm150); ctb-1(qm189) ugt-62</i> RNAi      | 30.52±1.06 | 36 | -7  | 101/120 | 0.0885  |
| Wild-type <i>hrpu-2</i> RNAi                       | 24.23±0.67 | 27 | +14 | 77/120  | 0.0038  |

|                                                |            |    |     |         |         |
|------------------------------------------------|------------|----|-----|---------|---------|
| <i>isp-1(qm150); ctb-1(qm189) hrpu-2</i> RNAi  | 29.59±0.93 | 34 | -10 | 89/120  | 0.0099  |
| Wild-type control RNAi                         | 21.66±0.61 | 26 |     | 96/140  |         |
| <i>isp-1(qm150); ctb-1(qm189) cont</i> RNAi    | 34.99±1.14 | 45 | +62 | 88/140  | <0.0001 |
| Wild-type <i>haf-3</i> RNAi                    | 19.74±0.39 | 23 | -9  | 108/140 | 0.0013  |
| <i>isp-1(qm150); ctb-1(qm189) haf-3</i> RNAi   | 34.85±1.08 | 45 | 0   | 81/140  | 0.7295  |
| Wild-type <i>patr-1</i> RNAi                   | 18.71±0.38 | 23 | -14 | 119/140 | <0.0001 |
| <i>isp-1(qm150); ctb-1(qm189) patr-1</i> RNAi  | 25.6±0.60  | 30 | -27 | 113/140 | <0.0001 |
| Wild-type <i>ugt-62</i> RNAi                   | 24.53±0.50 | 29 | +13 | 115/140 | 0.0026  |
| <i>isp-1(qm150); ctb-1(qm189) ugt-62</i> RNAi  | 32.47±1.16 | 42 | -7  | 92/140  | 0.4323  |
| Wild-type <i>hrpu-2</i> RNAi                   | 24.13±0.51 | 29 | +11 | 113/140 | 0.0148  |
| <i>isp-1(qm150); ctb-1(qm189) hrpu-2</i> RNAi  | 30.9±1.27  | 42 | -12 | 62/140  | 0.0157  |
| Wild-type control RNAi                         | 21±0.44    | 26 | 0   | 120/150 |         |
| <i>isp-1(qm150); ctb-1(qm189) control</i> RNAi | 29.45±0.82 | 35 | +40 | 113/150 | <0.0001 |
| Wild-type <i>asp-8</i> RNAi                    | 20.97±0.47 | 24 | 0   | 111/150 | 0.9335  |
| <i>isp-1(qm150); ctb-1(qm189) asp-8</i> RNAi   | 29.31±0.73 | 35 | 0   | 107/140 | 0.4523  |
| Wild-type <i>hmt-1</i> RNAi                    | 19.94±0.41 | 24 | -5  | 115/150 | 0.0224  |
| <i>isp-1(qm150); ctb-1(qm189) hmt-1</i> RNAi   | 28.99±0.67 | 35 | -2  | 124/150 | 0.271   |
| Wild-type control RNAi                         | 18.64±0.37 | 22 | 0   | 121/150 |         |
| <i>isp-1(qm150); ctb-1(qm189) control</i> RNAi | 27.57±0.65 | 32 | +48 | 125/150 | <0.0001 |

|                                              |            |    |     |         |        |
|----------------------------------------------|------------|----|-----|---------|--------|
| Wild-type <i>asp-8</i> RNAi                  | 19.45±0.37 | 22 | +4  | 105/150 | 0.1692 |
| <i>isp-1(qm150); ctb-1(qm189) asp-8</i> RNAi | 31.3±0.85  | 37 | +14 | 109/140 | 0.0001 |
| Wild-type <i>hmt-1</i> RNAi                  | 19.06±0.49 | 22 | +2  | 86/120  | 0.2896 |
| <i>isp-1(qm150); ctb-1(qm189) hmt-1</i> RNAi | 27.78±0.72 | 32 | +1  | 108/150 | 0.9423 |

In this table, the lifespan data sets within thick solid lines were performed in parallel.

Experimental repeats were divided by bold dashed lines.

Statistical analysis was performed within the same data set. Both control RNAi (L4440 empty vector) and *gfp* RNAi were used as control conditions. *p*-values were calculated using the log-rank (Mantel-Cox) method and calculated against the same control data [wild-type or *isp-1(qm150); ctb-1(qm189)* mutant animals treated with control or *gfp* RNAi].

<sup>Δ</sup>: % change in lifespan was calculated against the same control data [wild-type or *isp-1(qm150); ctb-1(qm189)* mutant animals treated with control or *gfp* RNAi]. Increased (+) or decreased (-) mean lifespan was indicated.

Treatment with *pmt-1* RNAi starting from egg hatching caused developmental arrest. Thus, we were not able to perform lifespan assays for *pmt-1* RNAi.

**Table S2B. Fourteen candidate RNAi clones that suppressed the longevity of *isp-1(qm150)* mutants (related to Figure 2B-D)**

| Strain/treatment                            | Mean lifespan<br>±SEM<br>(days) | 75th percentile | % change<br>Δ | Number of animals that died/total | p-value vs. control | Figure in text |
|---------------------------------------------|---------------------------------|-----------------|---------------|-----------------------------------|---------------------|----------------|
| Wild-type control RNAi                      | 19.95±0.47                      | 23              |               | 147/150                           |                     |                |
| <i>isp-1(qm150)</i> control RNAi            | 28.74±1.03                      | 36              | 44            | 86/90                             | <0.0001             |                |
| Wild-type <i>gpd-2/gpd-3</i> RNAi           | 20.99±0.44                      | 26              | 5             | 139/150                           | 0.2909              |                |
| <i>isp-1(qm150)</i> <i>gpd-2/gpd-3</i> RNAi | 26.36±0.94                      | 33              | -8            | 87/151                            | 0.0915              |                |
| Wild-type <i>mon-2</i> RNAi                 | 17.95±0.3                       | 21              | -11           | 181/240                           | <0.0001             |                |
| <i>isp-1(qm150)</i> <i>mon-2</i> RNAi       | 22.88±0.88                      | 29              | -20           | 115/121                           | 0.0003              |                |
| Wild-type <i>ugt-26</i> RNAi                | 20.05±0.39                      | 23              | 0             | 136/150                           | 0.416               |                |
| <i>isp-1(qm150)</i> <i>ugt-26</i> RNAi      | 26.10±0.84                      | 33              | -9            | 137/150                           | 0.1071              |                |
| Wild-type control RNAi                      | 16.00±0.3                       | 20              |               | 144/150                           |                     | Fig. 2B        |
| <i>isp-1(qm150)</i> control RNAi            | 26.61±0.79                      | 33              | 66            | 104/120                           | <0.0001             | Fig. 2B        |
| Wild-type <i>gpd-2/gpd-3</i> RNAi           | 16.39±0.28                      | 20              | 2             | 135/150                           | 0.5452              |                |
| <i>isp-1(qm150)</i> <i>gpd-2/gpd-3</i> RNAi | 24.31±0.88                      | 29              | -9            | 71/120                            | 0.0322              |                |
| Wild-type <i>mon-2</i> RNAi                 | 17.16±0.29                      | 21              | 7             | 64/120                            | 0.1349              | Fig. 2B        |
| <i>isp-1(qm150)</i> <i>mon-2</i> RNAi       | 20.31±0.77                      | 27              | -24           | 105/120                           | <0.0001             | Fig. 2B        |
| Wild-type <i>ugt-26</i> RNAi                | 16.08±0.28                      | 20              | 0             | 120/120                           | 0.7963              |                |
| <i>isp-1(qm150)</i> <i>ugt-26</i> RNAi      | 22.85±0.82                      | 29              | -14           | 104/120                           | 0.0054              |                |
| Wild-type control RNAi                      | 17.39±0.49                      | 20              |               | 65/120                            |                     | Fig. 2C        |
| <i>isp-1(qm150)</i> control RNAi            | 26.70±0.74                      | 34              | 54            | 100/120                           | <0.0001             | Fig. 2C        |
| Wild-type <i>hrpu-2</i> RNAi                | 16.73±0.51                      | 20              | -4            | 75/120                            | 0.5808              | Fig. 2C        |
| <i>isp-1(qm150)</i> <i>hrpu-2</i> RNAi      | 20.65±0.68                      | 25              | -23           | 106/120                           | <0.0001             | Fig. 2C        |
| Wild-type <i>patr-1</i> RNAi                | 17.92±0.37                      | 20              | 3             | 91/120                            | 0.6495              |                |
| <i>isp-1(qm150)</i> <i>patr-1</i> RNAi      | 18.80±0.59                      | 24              | -30           | 103/120                           | <0.0001             |                |
| Wild-type <i>haf-3</i> RNAi                 | 17.23±0.58                      | 22              | -1            | 54/120                            | 0.9787              |                |

|                                      |            |    |     |         |         |         |
|--------------------------------------|------------|----|-----|---------|---------|---------|
| <i>isp-1(qm150) haf-3</i> RNAi       | 24.00±0.79 | 30 | -10 | 106/120 | 0.0442  |         |
| Wild-type <i>alh-4/alh-5</i> RNAi    | 18.67±0.52 | 22 | 7   | 53/120  | 0.0932  |         |
| <i>isp-1(qm150) alh-4/alh-5</i> RNAi | 24.48±0.62 | 31 | -8  | 107/120 | 0.0003  |         |
| Wild-type <i>ugt-62</i> RNAi         | 18.60±0.47 | 20 | 7   | 57/120  | 0.1382  |         |
| <i>isp-1(qm150) ugt-62</i> RNAi      | 24.91±0.98 | 34 | -7  | 85/120  | 0.7427  |         |
| Wild-type control RNAi               | 21.38±0.57 | 26 |     | 90/120  |         | Fig. 2D |
| <i>isp-1(qm150)</i> control RNAi     | 28.24±0.86 | 36 | 32  | 114/120 | <0.0001 | Fig. 2D |
| Wild-type <i>hrpu-2</i> RNAi         | 18.36±0.54 | 23 | -14 | 96/120  | 0.0005  |         |
| <i>isp-1(qm150) hrpu-2</i> RNAi      | 24.05±0.82 | 31 | -15 | 112/120 | 0.0032  |         |
| Wild-type <i>patr-1</i> RNAi         | 19.55±0.5  | 23 | -9  | 108/121 | 0.0166  | Fig. 2D |
| <i>isp-1(qm150) patr-1</i> RNAi      | 20.59±0.66 | 23 | -27 | 107/120 | <0.0001 | Fig. 2D |
| Wild-type <i>haf-3</i> RNAi          | 19.97±0.58 | 26 | -7  | 92/120  | 0.1643  |         |
| <i>isp-1(qm150) haf-3</i> RNAi       | 24.44±0.86 | 31 | -13 | 102/120 | 0.0095  |         |
| Wild-type <i>alh-4/alh-5</i> RNAi    | 21.07±0.54 | 26 | -1  | 96/120  | 0.5272  |         |
| <i>isp-1(qm150) alh-4/alh-5</i> RNAi | 26.34±0.97 | 34 | -7  | 105/120 | 0.3783  |         |
| Wild-type <i>ugt-62</i> RNAi         | 20.57±0.54 | 26 | -4  | 86/120  | 0.2533  |         |
| <i>isp-1(qm150) ugt-62</i> RNAi      | 26.28±0.97 | 34 | -7  | 106/120 | 0.38    |         |
| Wild-type control RNAi               | 20.86±0.53 | 24 |     | 65/115  |         |         |
| <i>isp-1(qm150)</i> control RNAi     | 29.88±0.74 | 38 | 43  | 126/151 | <0.0001 |         |
| Wild-type <i>C35B1.5</i> RNAi        | 19.81±0.49 | 22 | -5  | 98/150  | 0.2105  |         |
| <i>isp-1(qm150) C35B1.5</i> RNAi     | 31.45±0.78 | 40 | 5   | 105/150 | 0.0977  |         |
| Wild-type <i>F48D6.4</i> RNAi        | 20.09±0.51 | 24 | -4  | 108/150 | 0.5783  |         |
| <i>isp-1(qm150) F48D6.4</i> RNAi     | 28.70±0.83 | 38 | -4  | 122/150 | 0.7083  |         |
| Wild-type <i>K01D12.15</i> RNAi      | 20.64±0.41 | 24 | -1  | 98/150  | 0.641   |         |
| <i>isp-1(qm150) K01D12.15</i> RNAi   | 31.29±0.78 | 37 | 5   | 116/150 | 0.2206  |         |
| Wild-type <i>pgp-6</i> RNAi          | 20.97±0.51 | 24 | 1   | 88/144  | 0.7566  |         |

|                                    |            |    |     |         |         |  |
|------------------------------------|------------|----|-----|---------|---------|--|
| <i>isp-1(qm150) pgp-6</i> RNAi     | 28.75±0.69 | 35 | -4  | 117/150 | 0.1767  |  |
| Wild-type <i>sodh-1</i> RNAi       | 21.05±0.54 | 24 | 1   | 84/150  | 0.6269  |  |
| <i>isp-1(qm150) sodh-1</i> RNAi    | 29.02±0.62 | 35 | -3  | 123/150 | 0.1032  |  |
| Wild-type <i>ugt-61</i> RNAi       | 21.17±0.45 | 24 | 1   | 111/150 | 0.5751  |  |
| <i>isp-1(qm150) ugt-61</i> RNAi    | 30.53±0.87 | 39 | 2   | 113/130 | 0.4158  |  |
| Wild-type control RNAi             | 17.40±0.35 | 20 |     | 108/150 |         |  |
| <i>isp-1(qm150) control</i> RNAi   | 27.19±0.69 | 33 | 56  | 131/150 | <0.0001 |  |
| Wild-type <i>C35B1.5</i> RNAi      | 18.98±0.61 | 22 | 9   | 73/150  | 0.0068  |  |
| <i>isp-1(qm150) C35B1.5</i> RNAi   | 26.39±0.73 | 33 | -3  | 128/150 | 0.6464  |  |
| Wild-type <i>F48D6.4</i> RNAi      | 16.54±0.42 | 20 | -5  | 92/150  | 0.196   |  |
| <i>isp-1(qm150) F48D6.4</i> RNAi   | 25.23±0.73 | 30 | -7  | 132/150 | 0.1421  |  |
| Wild-type <i>K01D12.15</i> RNAi    | 18.59±0.50 | 22 | 7   | 96/120  | 0.013   |  |
| <i>isp-1(qm150) K01D12.15</i> RNAi | 27.22±0.73 | 32 | 0   | 132/150 | 0.8836  |  |
| Wild-type <i>pgp-6</i> RNAi        | 17.20±0.41 | 20 | -1  | 92/140  | 0.8605  |  |
| <i>isp-1(qm150) pgp-6</i> RNAi     | 25.24±0.73 | 30 | -7  | 135/150 | 0.1427  |  |
| Wild-type <i>sodh-1</i> RNAi       | 17.05±0.49 | 20 | -2  | 96/120  | 0.9844  |  |
| <i>isp-1(qm150) sodh-1</i> RNAi    | 24.59±0.70 | 30 | -10 | 130/150 | 0.0117  |  |
| Wild-type <i>ugt-61</i> RNAi       | 17.25±0.36 | 20 | -1  | 108/150 | 0.7694  |  |
| <i>isp-1(qm150) ugt-61</i> RNAi    | 24.96±0.73 | 32 | -8  | 143/150 | 0.0324  |  |

In this table, the lifespan data sets within thick solid lines were performed in parallel.

Experimental repeats were divided by bold dashed lines.

Statistical analysis was performed within the same data set. *p*-values were calculated using the log-rank (Mantel-Cox) method and calculated against the same control data [wild-type or *isp-1(qm150)* mutant animals treated with control RNAi].

Δ: % change in lifespan was calculated against the same control data [wild-type or *isp-1(qm150)* mutant animals treated with control RNAi].

**Table S2C. Lifespan measurements of *isp-1* and *clk-1* mutants with *mon-2*, *hrpu-2*, *patr-1* mutations (related to Figure 2E-K)**

| Strain/treatment                   | Mean survival<br>±SEM<br>(days) | 75th<br>percent<br>tile | %<br>change<br>Δ | Number of<br>animals<br>that<br>died/total | p-value<br>vs.<br>control | Figure<br>in text |
|------------------------------------|---------------------------------|-------------------------|------------------|--------------------------------------------|---------------------------|-------------------|
| Wild-type                          | 19.01±0.51                      | 23                      |                  | 129/150                                    |                           |                   |
| <i>mon-2(xh22)</i>                 | 16.73±0.34                      | 20                      | -12              | 115/150                                    | <0.0001                   |                   |
| <i>isp-1(qm150)</i>                | 25.01±0.8                       | 33                      | 32               | 136/150                                    | <0.0001                   |                   |
| <i>isp-1(qm150) mon-2(xh22)</i>    | 18.81±0.52                      | 23                      | -25              | 140/150                                    | <0.0001                   |                   |
| <i>clk-1(qm30)</i>                 | 20.91±0.68                      | 25                      | 10               | 126/150                                    | 0.0152                    |                   |
| <i>clk-1(qm30); mon-2(xh22)</i>    | 16.37±0.42                      | 19                      | -22              | 117/150                                    | <0.0001                   |                   |
| Wild-type                          | 16.32±0.39                      | 20                      |                  | 137/150                                    |                           | Fig. 2E-F         |
| <i>mon-2(xh22)</i>                 | 14.31±0.33                      | 16                      | -12              | 113/150                                    | <0.0001                   | Fig. 2E-F         |
| <i>isp-1(qm150)</i>                | 21±0.64                         | 26                      | 29               | 114/150                                    | <0.0001                   | Fig. 2E           |
| <i>isp-1(qm150) mon-2(xh22)</i>    | 15.72±0.36                      | 20                      | -25              | 137/150                                    | <0.0001                   | Fig. 2E           |
| <i>clk-1(qm30)</i>                 | 19.29±0.55                      | 24                      | 18               | 119/150                                    | <0.0001                   | Fig. 2F           |
| <i>clk-1(qm30); mon-2(xh22)</i>    | 13.86±0.31                      | 16                      | -28              | 144/150                                    | <0.0001                   | Fig. 2F           |
| Wild-type                          | 24.57±0.31                      | 28                      |                  | 139/150                                    |                           |                   |
| <i>hrpu-2(tm1474)</i>              | 21.04±0.26                      | 23                      | -14              | 126/150                                    | <0.0001                   |                   |
| <i>isp-1(qm150)</i>                | 29.49±0.65                      | 36                      | 20               | 129/150                                    | <0.0001                   |                   |
| <i>hrpu-2(tm1474) isp-1(qm150)</i> | 26.58±0.83                      | 30                      | -10              | 106/150                                    | 0.1418                    |                   |
| <i>clk-1(qm30)</i>                 | 30.37±0.59                      | 37                      | 24               | 99/120                                     | <0.0001                   |                   |
| <i>clk-1(qm30); hrpu-2(tm1474)</i> | 23.23±0.23                      | 26                      | -24              | 127/150                                    | <0.0001                   |                   |
| Wild-type                          | 21.34±0.3                       | 24                      |                  | 114/120                                    |                           |                   |
| <i>hrpu-2(tm1474)</i>              | 21.5±0.3                        | 24                      | 1                | 127/150                                    | 0.5088                    |                   |
| <i>isp-1(qm150)</i>                | 27.67±0.5                       | 31                      | 30               | 136/150                                    | <0.0001                   |                   |
| <i>hrpu-2(tm1474) isp-1(qm150)</i> | 24.76±0.64                      | 30                      | -11              | 108/150                                    | 0.0055                    |                   |
| <i>clk-1(qm30)</i>                 | 22.66±0.39                      | 26                      | 6                | 136/150                                    | 0.0001                    |                   |
| <i>clk-1(qm30); hrpu-2(tm1474)</i> | 24.19±0.42                      | 28                      | 7                | 132/150                                    | 0.0043                    |                   |
| Wild-type                          | 17.54±0.49                      | 21                      |                  | 120/150                                    |                           | Fig. 2G-H         |
| <i>hrpu-2(tm1474)</i>              | 16.05±0.37                      | 19                      | -8               | 123/150                                    | 0.0027                    | Fig. 2G-H         |
| <i>isp-1(qm150)</i>                | 30.28±0.91                      | 39                      | 73               | 124/150                                    | <0.0001                   | Fig. 2G           |
| <i>hrpu-2(tm1474) isp-1(qm150)</i> | 25.56±0.81                      | 33                      | -16              | 141/152                                    | <0.0001                   | Fig. 2G           |
| <i>clk-1(qm30)</i>                 | 20.41±0.7                       | 28                      | 16               | 99/150                                     | 0.0001                    | Fig. 2H           |

|                                             |            |    |     |         |         |           |
|---------------------------------------------|------------|----|-----|---------|---------|-----------|
| <i>clk-1(qm30); hrpu-2(tm1474)</i>          | 15.58±0.52 | 19 | -24 | 130/150 | <0.0001 | Fig. 2H   |
| Wild-type                                   | 14.43±0.41 | 17 |     | 92/150  |         |           |
| <i>hrpu-2(tm1474)</i>                       | 15.03±0.42 | 19 | 4   | 119/150 | 0.1994  |           |
| <i>isp-1(qm150)</i>                         | 23.93±1.04 | 32 | 66  | 73/90   | <0.0001 |           |
| <i>hrpu-2(tm1474) isp-1(qm150)</i>          | 22.17±0.56 | 27 | -7  | 132/150 | 0.01    |           |
| <i>clk-1(qm30)</i>                          | 16.8±0.58  | 21 | 16  | 86/150  | 0.0008  |           |
| <i>clk-1(qm30); hrpu-2(tm1474)</i>          | 12.84±0.31 | 15 | -24 | 129/150 | <0.0001 |           |
| Wild-type                                   | 16.18±0.43 | 22 |     | 141/153 |         |           |
| <i>patr-1(gk155841)</i>                     | 21.07±0.4  | 25 | 30  | 126/150 | <0.0001 |           |
| <i>isp-1(qm150)</i>                         | 24.97±0.84 | 31 | 54  | 131/152 | <0.0001 |           |
| <i>patr-1(gk155841); isp-1(qm150)</i>       | 21.16±0.78 | 26 | -15 | 112/120 | 0.0009  |           |
| <i>clk-1(qm30)</i>                          | 21.13±0.51 | 25 | 31  | 124/150 | <0.0001 |           |
| <i>patr-1(gk155841); clk-1(qm30)</i>        | 16.3±0.48  | 17 | -23 | 127/150 | <0.0001 |           |
| Wild-type                                   | 13.28±0.25 | 15 |     | 135/150 |         | Fig. 2I-J |
| <i>patr-1(gk155841)</i>                     | 15.82±0.33 | 17 | 19  | 130/150 | <0.0001 | Fig. 2I-J |
| <i>isp-1(qm150)</i>                         | 22.94±0.66 | 29 | 73  | 127/150 | <0.0001 | Fig. 2I   |
| <i>patr-1(gk155841); isp-1(qm150)</i>       | 16.86±0.64 | 20 | -27 | 131/150 | <0.0001 | Fig. 2I   |
| <i>clk-1(qm30)</i>                          | 17.13±0.55 | 21 | 29  | 119/150 | <0.0001 | Fig. 2J   |
| <i>patr-1(gk155841); clk-1(qm30)</i>        | 11.59±0.34 | 13 | -32 | 122/150 | <0.0001 | Fig. 2J   |
| Wild-type <sup>#</sup>                      | 16.66±0.46 | 20 |     | 84/120  |         | Fig. 2K   |
| <i>mon-2(xh22)<sup>#</sup></i>              | 18.45±0.65 | 23 | 11  | 77/150  | 0.0204  | Fig. 2K   |
| <i>isp-1(qm150)<sup>#</sup></i>             | 24.72±1.01 | 31 | 48  | 71/150  | <0.0001 | Fig. 2K   |
| <i>isp-1(qm150) mon-2(xh22)<sup>#</sup></i> | 19.39±0.68 | 24 | -22 | 113/150 | <0.0001 | Fig. 2K   |
| Wild-type <sup>#</sup>                      | 21.89±0.46 | 26 |     | 92/150  |         |           |
| <i>mon-2(xh22)<sup>#</sup></i>              | 20.2±0.63  | 24 | -8  | 59/120  | 0.0294  |           |
| <i>isp-1(qm150)<sup>#</sup></i>             | 24.21±0.77 | 31 | 11  | 106/150 | 0.006   |           |
| <i>isp-1(qm150) mon-2(xh22)<sup>#</sup></i> | 20.03±0.47 | 23 | -17 | 146/200 | <0.0001 |           |
| Wild-type <sup>#</sup>                      | 16.16±0.42 | 19 |     | 59/150  |         |           |
| <i>mon-2(xh22)<sup>#</sup></i>              | 16.79±0.42 | 18 | 4   | 64/390  | 0.2917  |           |
| Wild-type <sup>#</sup>                      | 15.26±0.46 | 17 |     | 69/150  |         |           |
| <i>mon-2(xh22)<sup>#</sup></i>              | 14.76±0.43 | 17 | -3  | 68/390  | 0.1196  |           |

In this table, the lifespan data sets within thick solid lines were performed in parallel. Experimental repeats were divided by bold dashed lines.

Statistical analysis was performed within the same data set. *p*-values were calculated using the log-rank (Mantel-Cox) method and calculated against the same control data [wild-type, *isp-1(qm150)* or *clk-1(qm30)* mutant animals].

<sup>Δ</sup>: % change in lifespan was calculated against the same control data [wild-type, *isp-1(qm150)* or *clk-1(qm30)* mutant animals].

<sup>#</sup> indicates lifespan assay without 5-fluoro-2'-deoxyuridine (FUDR) treatment.

**Table S3. The effect of *mon-2* mutation on the lifespan of various long-living mutants or *cco-1* RNAi-treated animals (related to Figure 3A-D)**

| Strain/treatment                  | Mean survival<br>±SEM<br>(days) | 75th<br>percen<br>tile | %<br>change<br>$\Delta$                   | Number of<br>animals<br>that<br>died/total | p-value<br>vs.<br>control          | Figure<br>in text |
|-----------------------------------|---------------------------------|------------------------|-------------------------------------------|--------------------------------------------|------------------------------------|-------------------|
| Wild-type control RNAi            | 18.45±0.42                      | 23                     |                                           | 121/151                                    |                                    | Fig. 3A           |
| Wild-type <i>cco-1</i> RNAi       | 33.58±0.77                      | 41                     | 82                                        | 111/150                                    | <0.0001                            | Fig. 3A           |
| <i>mon-2(xh22)</i> control RNAi   | 17.82±0.34                      | 21                     | -3                                        | 121/150                                    | 0.0206                             | Fig. 3A           |
| <i>mon-2(xh22) cco-1</i> RNAi     | 30.03±0.5                       | 33                     | -11 <sup>WT</sup><br><i>cco-1</i><br>RNAi | 113/150                                    | <0.0001<br>WT <i>cco-1</i><br>RNAi | Fig. 3A           |
| Wild-type control RNAi            | 18.57±0.36                      | 22                     |                                           | 114/150                                    |                                    |                   |
| Wild-type <i>cco-1</i> RNAi       | 28.77±0.72                      | 37                     | 55                                        | 137/150                                    | <0.0001                            |                   |
| <i>mon-2(xh22)</i> control RNAi   | 17.66±0.29                      | 22                     | -5                                        | 122/150                                    | 0.0003                             |                   |
| <i>mon-2(xh22) cco-1</i> RNAi     | 26.88±0.41                      | 31                     | -7 <sup>WT</sup><br><i>cco-1</i><br>RNAi  | 135/150                                    | <0.0001<br>WT <i>cco-1</i><br>RNAi |                   |
| Wild-type                         | 20.01±0.39                      | 23                     |                                           | 125/150                                    |                                    | Fig. 3B-C         |
| <i>mon-2(xh22)</i>                | 18.93±0.41                      | 21                     | -5                                        | 131/155                                    | 0.5247                             | Fig. 3B-C         |
| <i>eat-2(ad1116)</i>              | 26.04±0.48                      | 30                     | 30                                        | 111/175                                    | <0.0001                            | Fig. 3C           |
| <i>eat-2(ad1116); mon-2(xh22)</i> | 19.34±0.5                       | 23                     | -26 <sup><i>eat-2(ad1116)</i></sup>       | 117/150                                    | <0.0001<br><i>eat-2(ad1116)</i>    | Fig. 3C           |
| <i>daf-2(e1370)</i>               | 37.63±0.82                      | 42                     | 88                                        | 100/120                                    | <0.0001                            | Fig. 3B           |
| <i>daf-2(e1370); mon-2(xh22)</i>  | 25.35±0.67                      | 32                     | -33 <sup><i>daf-2(e1370)</i></sup>        | 133/150                                    | <0.0001<br><i>daf-2(e1370)</i>     | Fig. 3B           |
| Wild-type                         | 16.39±0.25                      | 18                     |                                           | 121/150                                    |                                    |                   |
| <i>mon-2(xh22)</i>                | 17.3±0.28                       | 20                     | 6                                         | 127/150                                    | 0.0117                             |                   |
| <i>eat-2(ad1116)</i>              | 21.47±0.46                      | 24                     | 31                                        | 111/150                                    | <0.0001                            |                   |
| <i>eat-2(ad1116); mon-2(xh22)</i> | 15.35±0.38                      | 20                     | -29 <sup><i>eat-2(ad1116)</i></sup>       | 135/150                                    | <0.0001<br><i>eat-2(ad1116)</i>    |                   |
| <i>daf-2(e1370)</i>               | 34.31±1.08                      | 43                     | 109                                       | 101/120                                    | <0.0001                            |                   |
| <i>daf-2(e1370); mon-2(xh22)</i>  | 25.12±0.87                      | 34                     | -27 <sup><i>daf-2(e1370)</i></sup>        | 126/150                                    | <0.0001<br><i>daf-2(e1370)</i>     |                   |
| Wild-type fed                     | 14.48±0.54                      | 17                     |                                           | 115/120                                    |                                    | Fig. 3D           |
| Wild-type FD                      | 25.15±0.73                      | 31                     | 74                                        | 142/160                                    | <0.0001                            | Fig. 3D           |
| <i>mon-2(xh22)</i> fed            | 14.73±0.5                       | 19                     | 2                                         | 111/120                                    | 0.9156                             | Fig. 3D           |
| <i>mon-2(xh22)</i> FD             | 20.43±0.46                      | 25                     | -19 <sup>WT</sup><br>FD                   | 212/240                                    | <0.0001<br>WT FD                   | Fig. 3D           |

|                        |            |    |                                 |         |                          |  |
|------------------------|------------|----|---------------------------------|---------|--------------------------|--|
| Wild-type fed          | 19.02±0.68 | 23 |                                 | 105/120 |                          |  |
| Wild-type FD           | 23.88±0.43 | 28 | 26                              | 165/240 | <0.0001                  |  |
| <i>mon-2(xh22)</i> fed | 17.27±0.41 | 19 | -9                              | 92/120  | 0.0142                   |  |
| <i>mon-2(xh22)</i> FD  | 21.1±0.37  | 26 | -12 <sup>WT</sup> <sub>FD</sub> | 172/240 | <0.0001 <sub>WT FD</sub> |  |
| Wild-type fed          | 18.78±0.6  | 22 |                                 | 104/120 |                          |  |
| Wild-type FD           | 24.46±0.54 | 27 | 30                              | 74/199  | <0.0001                  |  |
| <i>mon-2(xh22)</i> fed | 19.02±0.44 | 22 | 1                               | 89/120  | 0.6818                   |  |
| <i>mon-2(xh22)</i> FD  | 20.37±0.33 | 24 | -17 <sup>WT</sup> <sub>FD</sub> | 173/240 | <0.0001 <sub>WT FD</sub> |  |

In this table, the lifespan data sets within thick solid lines were performed in parallel.

Experimental repeats were divided by bold dashed lines.

Statistical analysis was performed within the same data set. *p*-values were calculated using the log-rank (Mantel-Cox) method and calculated against the same control data [wild-type control RNAi, wild-type or wild-type fed conditions] or against indicated condition as superscript.

Δ: % change in lifespan was calculated against the same control data [wild-type control RNAi, wild-type or wild-type fed conditions] or against indicated condition as superscript. FD indicates food deprived conditions.

*mon-2(-)* mutations did not affect lifespan in the WT background in five out of 11 trials, slightly decreased that in four out of 11 trials, and slightly increased that in two out of 11 trials. Overall, the effects of *mon-2(-)* on the lifespan of WT animals are variable but do not seem to be significant (*p* = 0.3156, one sample *t*-test using % change of lifespan caused by *mon-2(-)*).

**Table S4. Lifespan measurement with animals expressing *mon-2::gfp* (related to Fig. 3E-G)**

| Strain/treatment                               | Mean survival<br>±SEM<br>(days) | 75th<br>percen<br>tile | %<br>change<br>Δ                         | Number of<br>animals<br>that<br>died/total | p-value<br>vs.<br>control                 | Figure<br>in text |
|------------------------------------------------|---------------------------------|------------------------|------------------------------------------|--------------------------------------------|-------------------------------------------|-------------------|
| <i>isp-1(qm150) mon-2(xh22)</i>                | 20.89±0.77                      | 24                     |                                          | 101/120                                    |                                           | Fig. 3E           |
| <i>isp-1(qm150)</i>                            | 27.80±0.77                      | 36                     | 33                                       | 145/151                                    | <0.0001                                   | Fig. 3E           |
| <i>isp-1(qm150) mon-2(xh22); mon-2::gfp #1</i> | 27.75±0.73                      | 33                     | 33                                       | 107/122                                    | <0.0001                                   | Fig. 3E           |
| <i>isp-1(qm150) mon-2(xh22); mon-2::gfp #2</i> | 26.90±0.79                      | 35                     | 29                                       | 120/150                                    | <0.0001                                   | Fig. 3E           |
| <i>isp-1(qm150) mon-2(xh22); mon-2::gfp #3</i> | 27.38±0.72                      | 35                     | 31                                       | 123/150                                    | <0.0001                                   | Fig. 3E           |
| <i>isp-1(qm150) mon-2(xh22)</i>                | 17.78±0.57                      | 22                     |                                          | 129/150                                    |                                           |                   |
| <i>isp-1(qm150)</i>                            | 26.11±0.72                      | 32                     | 47                                       | 98/118                                     | <0.0001                                   |                   |
| <i>isp-1(qm150) mon-2(xh22); mon-2::gfp #1</i> | 25.09±0.61                      | 31                     | 41                                       | 115/150                                    | <0.0001                                   |                   |
| <i>isp-1(qm150) mon-2(xh22); mon-2::gfp #2</i> | 24.42±0.62                      | 28                     | 37                                       | 114/150                                    | <0.0001                                   |                   |
| <i>isp-1(qm150) mon-2(xh22); mon-2::gfp #3</i> | 25.10±0.72                      | 31                     | 41                                       | 82/120                                     | <0.0001                                   |                   |
| Wild-type                                      | 15.95±0.53                      | 19                     |                                          | 112/120                                    |                                           | Fig. 3F           |
| <i>mon-2::gfp #1</i>                           | 16.43±0.48                      | 21                     | 3                                        | 111/120                                    | 0.6991                                    | Fig. 3F           |
| <i>mon-2::gfp #2</i>                           | 16.2±0.47                       | 19                     | 2                                        | 101/120                                    | 0.7825                                    | Fig. 3F           |
| <i>mon-2::gfp #3</i>                           | 15.65±0.44                      | 19                     | -2                                       | 112/121                                    | 0.5968                                    | Fig. 3F           |
| Wild-type                                      | 14.3±0.34                       | 16                     |                                          | 115/120                                    |                                           |                   |
| <i>mon-2::gfp #1</i>                           | 15.28±0.39                      | 19                     | 7                                        | 117/120                                    | 0.0514                                    |                   |
| <i>mon-2::gfp #2</i>                           | 14.09±0.37                      | 16                     | -1                                       | 113/125                                    | 0.7732                                    |                   |
| <i>mon-2::gfp #3</i>                           | 13.36±0.33                      | 16                     | -7                                       | 106/120                                    | 0.0735                                    |                   |
| Wild-type                                      | 18.23±0.52                      | 24                     |                                          | 103/120                                    |                                           |                   |
| <i>mon-2::gfp #1</i>                           | 20.24±0.53                      | 24                     | 11                                       | 101/120                                    | 0.0081                                    |                   |
| <i>mon-2::gfp #2</i>                           | 21.45±0.47                      | 24                     | 18                                       | 110/150                                    | <0.0001                                   |                   |
| <i>mon-2::gfp #3</i>                           | 21.49±0.49                      | 27                     | 18                                       | 137/150                                    | <0.0001                                   |                   |
| Wild-type control RNAi                         | 21.47±0.48                      | 26                     |                                          | 93/120                                     |                                           | Fig. 3G           |
| <i>mon-2::gfp #1</i><br>control RNAi           | 21.05±0.59                      | 26                     | -2                                       | 92/120                                     | 0.6259                                    | Fig. 3G           |
| Wild-type <i>cco-1</i> RNAi                    | 34.29±0.88                      | 42                     | 60                                       | 106/120                                    | <0.0001                                   | Fig. 3G           |
| <i>mon-2::gfp #1 cco-1</i><br>RNAi             | 39.13±0.88                      | 45                     | 14 <sup>WT</sup><br><i>cco-1</i><br>RNAi | 104/120                                    | 0.0001 <sup>WT</sup><br><i>cco-1</i> RNAi | Fig. 3G           |
| Wild-type control RNAi                         | 18.96±0.47                      | 22                     |                                          | 95/120                                     |                                           |                   |
| <i>mon-2::gfp #1</i><br>control RNAi           | 19.76±0.48                      | 22                     | 4                                        | 96/119                                     | 0.2382                                    |                   |

|                                        |            |    |                                          |         |                                    |  |
|----------------------------------------|------------|----|------------------------------------------|---------|------------------------------------|--|
| Wild-type <i>cco-1</i> RNAi            | 30.75±0.63 | 36 | 62                                       | 111/120 | <0.0001                            |  |
| <i>mon-2::gfp</i> #1 <i>cco-1</i> RNAi | 34.28±0.54 | 39 | 11 <sup>WT</sup><br><i>cco-1</i><br>RNAi | 114/120 | <0.0001<br>WT <i>cco-1</i><br>RNAi |  |

In this table, the lifespan data sets within thick solid lines were performed in parallel.

Experimental repeats were divided by bold dashed lines.

Statistical analysis was done within the same data set. *p*-values were calculated using the log-rank (Mantel-Cox) method and calculated against the same control data [wild-type or *isp-1(qm150) mon-2(xh22)* mutant animals].

Δ: % change in lifespan was calculated against the same control data [wild-type or *isp-1(qm150) mon-2(xh22)* mutant animals] or against indicated condition as superscript.

# indicates lifespan assay without FUDR treatment.

**Table S5. The effect of genetic inhibition of factors that mediate membrane trafficking on the lifespan of *isp-1(qm150)* mutants or *cco-1* RNAi-treated animals (related to Figure 4 and Figure S3)**

| Strain/treatment                             | Mean survival<br>±SEM<br>(days) | 75th<br>percen<br>tile | %<br>change<br><sup>Δ</sup>   | Number of<br>animals<br>that<br>died/total | p-value<br>vs.<br>control         | Figure<br>in text            |
|----------------------------------------------|---------------------------------|------------------------|-------------------------------|--------------------------------------------|-----------------------------------|------------------------------|
| Wild-type control RNAi                       | 18.26±0.43                      | 21                     |                               | 140/180                                    |                                   | Fig. 4H<br>and Fig.<br>S3A-E |
| Wild-type <i>mon-2</i> RNAi                  | 17±0.42                         | 21                     | -7                            | 108/180                                    | 0.0097                            |                              |
| Wild-type <i>rab-10</i> RNAi                 | 21±0.35                         | 23                     | 15                            | 157/180                                    | 0.0002                            | Fig. S3A                     |
| Wild-type <i>pad-1</i> RNAi                  | 16.83±0.29                      | 19                     | -8                            | 155/180                                    | <0.0001                           | Fig. 4H                      |
| Wild-type <i>golg-2</i> RNAi                 | 20.39±0.44                      | 23                     | 12                            | 135/180                                    | 0.0015                            | Fig. S3B                     |
| Wild-type <i>gcc-1</i> RNAi                  | 18.96±0.43                      | 21                     | 4                             | 122/150                                    | 0.5837                            | Fig. S3C                     |
| Wild-type <i>Y47G6A.18</i><br>RNAi           | 18.92±0.4                       | 21                     | 4                             | 98/180                                     | 0.8977                            | Fig. S3D                     |
| Wild-type <i>C34D4.4</i> RNAi                | 19.38±0.38                      | 21                     | 6                             | 109/150                                    | 0.3857                            | Fig. S3E                     |
| <i>isp-1(qm150)</i> control<br>RNAi          | 27.42±0.66                      | 34                     | 50                            | 150/180                                    | <0.0001                           | Fig. 4H<br>and Fig.<br>S3A-E |
| <i>isp-1(qm150)</i> <i>mon-2</i> RNAi        | 24.15±0.55                      | 28                     | -12 <i>isp-1</i><br>ctrl RNAi | 144/180                                    | <0.0001<br><i>isp-1</i> ctrl RNAi |                              |
| <i>isp-1(qm150)</i> <i>rab-10</i><br>RNAi    | 29.83±0.62                      | 37                     | 9 <i>isp-1</i><br>ctrl RNAi   | 155/180                                    | 0.0132 <i>isp-1</i><br>ctrl RNAi  | Fig. S3A                     |
| <i>isp-1(qm150)</i> <i>pad-1</i> RNAi        | 22.21±0.51                      | 28                     | -19 <i>isp-1</i><br>ctrl RNAi | 151/180                                    | <0.0001<br><i>isp-1</i> ctrl RNAi | Fig. 4H                      |
| <i>isp-1(qm150)</i> <i>golg-2</i><br>RNAi    | 25.65±0.75                      | 31                     | -6 <i>isp-1</i><br>ctrl RNAi  | 146/180                                    | 0.4018 <i>isp-1</i><br>ctrl RNAi  | Fig. S3B                     |
| <i>isp-1(qm150)</i> <i>gcc-1</i> RNAi        | 26.87±0.76                      | 34                     | -2 <i>isp-1</i><br>ctrl RNAi  | 152/180                                    | 0.6296 <i>isp-1</i><br>ctrl RNAi  | Fig. S3C                     |
| <i>isp-1(qm150)</i> <i>Y47G6A.18</i><br>RNAi | 28.39±0.74                      | 37                     | 4 <i>isp-1</i> ctrl<br>RNAi   | 137/180                                    | 0.1151 <i>isp-1</i><br>ctrl RNAi  | Fig. S3D                     |
| <i>isp-1(qm150)</i> <i>C34D4.4</i><br>RNAi   | 25.96±0.86                      | 31                     | -5 <i>isp-1</i><br>ctrl RNAi  | 88/120                                     | 0.3304 <i>isp-1</i><br>ctrl RNAi  | Fig. S3E                     |
| Wild-type control RNAi                       | 21.48±0.47                      | 25                     |                               | 109/150                                    |                                   |                              |
| Wild-type <i>mon-2</i> RNAi                  | 20.23±0.46                      | 25                     | -6 <i>isp-1</i><br>ctrl RNAi  | 81/120                                     | 0.0165                            |                              |
| Wild-type <i>rab-10</i> RNAi                 | 23.24±0.49                      | 27                     | 8                             | 97/120                                     | 0.0021                            |                              |
| Wild-type <i>pad-1</i> RNAi                  | 19.21±0.31                      | 21                     | -11                           | 123/150                                    | <0.0001                           |                              |
| Wild-type <i>golg-2</i> RNAi                 | 23.16±0.35                      | 25                     | 8                             | 119/150                                    | 0.0341                            |                              |
| Wild-type <i>gcc-1</i> RNAi                  | 23.29±0.43                      | 27                     | 8                             | 115/150                                    | 0.0024                            |                              |

|                                          |            |    |                                     |         |                                         |          |
|------------------------------------------|------------|----|-------------------------------------|---------|-----------------------------------------|----------|
| Wild-type <i>Y47G6A.18</i> RNAi          | 20.87±0.44 | 25 | -3                                  | 98/150  | 0.1462                                  |          |
| Wild-type <i>C34D4.4</i> RNAi            | 21.5±0.41  | 25 | 0                                   | 110/150 | 0.7471                                  |          |
| <i>isp-1(qm150)</i> control RNAi         | 27.18±0.6  | 30 | 27                                  | 92/120  | <0.0001                                 |          |
| <i>isp-1(qm150) mon-2</i> RNAi           | 25.7±0.53  | 30 | -5 <i>isp-1</i> ctrl RNAi           | 124/150 | 0.0786 <i>isp-1</i> ctrl RNAi           |          |
| <i>isp-1(qm150) rab-10</i> RNAi          | 28.29±0.76 | 34 | 4 <i>isp-1</i> ctrl RNAi            | 81/150  | 0.116 <i>isp-1</i> ctrl RNAi            |          |
| <i>isp-1(qm150) pad-1</i> RNAi           | 25.2±0.49  | 30 | -7 <i>isp-1</i> ctrl RNAi           | 124/150 | 0.0062 <i>isp-1</i> ctrl RNAi           |          |
| <i>isp-1(qm150) golg-2</i> RNAi          | 27.56±0.59 | 30 | 1 <i>isp-1</i> ctrl RNAi            | 95/120  | 0.6306 <i>isp-1</i> ctrl RNAi           |          |
| <i>isp-1(qm150) gcc-1</i> RNAi           | 26.86±0.62 | 34 | -1 <i>isp-1</i> ctrl RNAi           | 112/150 | 0.9434 <i>isp-1</i> ctrl RNAi           |          |
| <i>isp-1(qm150) Y47G6A.18</i> RNAi       | 26.87±0.63 | 30 | -1 <i>isp-1</i> ctrl RNAi           | 87/150  | 0.861 <i>isp-1</i> ctrl RNAi            |          |
| <i>isp-1(qm150) C34D4.4</i> RNAi         | 25.19±0.51 | 30 | -7 <i>isp-1</i> ctrl RNAi           | 121/150 | 0.0152 <i>isp-1</i> ctrl RNAi           |          |
| Wild-type control RNAi <sup>#</sup>      | 18.45±0.42 | 23 |                                     | 121/151 |                                         | Fig. S3F |
| Wild-type <i>cco-1</i> RNAi <sup>#</sup> | 33.58±0.77 | 41 | 82                                  | 111/150 | <0.0001                                 | Fig. S3F |
| <i>tbc-3(xh23)</i> control RNAi          | 17.59±0.46 | 22 | -5                                  | 105/150 | 0.1705                                  | Fig. S3F |
| <i>tbc-3(xh23) cco-1</i> RNAi            | 27.93±0.65 | 32 | -17 <sup>WT</sup> <i>cco-1</i> RNAi | 115/150 | <0.0001 <sup>WT</sup> <i>cco-1</i> RNAi | Fig. S3F |
| Wild-type control RNAi <sup>#</sup>      | 18.57±0.36 | 22 |                                     | 114/150 |                                         |          |
| Wild-type <i>cco-1</i> RNAi <sup>#</sup> | 28.77±0.72 | 37 | 55                                  | 137/150 | <0.0001                                 |          |
| <i>tbc-3(xh23)</i> control RNAi          | 16±0.42    | 21 | -14                                 | 131/150 | 0.0004                                  |          |
| <i>tbc-3(xh23) cco-1</i> RNAi            | 27.96±0.35 | 32 | -3 <sup>WT</sup> <i>cco-1</i> RNAi  | 139/150 | 0.0001 <sup>WT</sup> <i>cco-1</i> RNAi  |          |
| Wild-type control RNAi                   | 16±0.3     | 18 |                                     | 144/150 |                                         | Fig. 4J  |
| Wild-type <i>mon-2</i> RNAi              | 17.16±0.29 | 18 | 7                                   | 64/120  | 0.1349                                  |          |
| Wild-type <i>tbc-3</i> RNAi              | 16.15±0.21 | 18 | 1                                   | 147/150 | 0.5612                                  | Fig. 4J  |
| <i>isp-1(qm150)</i> control RNAi         | 26.61±0.79 | 33 | 66                                  | 104/150 | <0.0001                                 | Fig. 4J  |
| <i>isp-1(qm150) mon-2</i> RNAi           | 20.31±0.77 | 27 | -24 <i>isp-1</i> ctrl RNAi          | 105/120 | <0.0001 <i>isp-1</i> ctrl RNAi          |          |
| <i>isp-1(qm150) tbc-3</i> RNAi           | 20.67±0.82 | 27 | -22 <i>isp-1</i> ctrl RNAi          | 94/150  | <0.0001 <i>isp-1</i> ctrl RNAi          | Fig. 4J  |
| Wild-type control RNAi                   | 19.95±0.47 | 23 |                                     | 147/150 |                                         |          |
| Wild-type <i>mon-2</i> RNAi              | 17.59±0.35 | 23 | -12                                 | 137/150 | <0.0001                                 |          |
| Wild-type <i>tbc-3</i> RNAi              | 20.19±0.39 | 23 | 1                                   | 143/152 | 0.5715                                  |          |

|                                        |            |    |                                          |         |                                                           |         |
|----------------------------------------|------------|----|------------------------------------------|---------|-----------------------------------------------------------|---------|
| <i>isp-1(qm150)</i> control RNAi       | 28.74±1.03 | 36 | 44                                       | 86/90   | <0.0001                                                   |         |
| <i>isp-1(qm150)</i> <i>mon-2</i> RNAi  | 22.88±0.88 | 38 | -20 <sup><i>isp-1</i></sup><br>ctrl RNAi | 115/121 | 0.0003 <sup><i>isp-1</i></sup><br>ctrl RNAi               |         |
| <i>isp-1(qm150)</i> <i>tbc-3</i> RNAi  | 23.6±0.76  | 29 | -18 <sup><i>isp-1</i></sup><br>ctrl RNAi | 120/145 | <0.0001 <sup><i>isp-1</i></sup><br><i>isp-1</i> ctrl RNAi |         |
| Wild-type control RNAi*                | 21.46±0.41 | 23 |                                          | 103/120 |                                                           | Fig. 4I |
| Wild-type <i>mon-2</i> RNAi*           | 19.26±0.3  | 21 | -10                                      | 107/120 | <0.0001                                                   |         |
| Wild-type <i>tbc-3</i> RNAi*           | 20.59±0.33 | 23 | -4                                       | 105/120 | 0.0723                                                    |         |
| Wild-type <i>snx-3</i> RNAi*           | 21.94±0.35 | 25 | 2                                        | 109/120 | 0.5442                                                    | Fig. 4I |
| <i>isp-1(qm150)</i> control RNAi*      | 26.53±0.71 | 30 | 24                                       | 100/120 | <0.0001                                                   | Fig. 4I |
| <i>isp-1(qm150)</i> <i>mon-2</i> RNAi* | 22.62±0.56 | 26 | -15 <sup><i>isp-1</i></sup><br>ctrl RNAi | 99/120  | <0.0001 <sup><i>isp-1</i></sup><br><i>isp-1</i> ctrl RNAi |         |
| <i>isp-1(qm150)</i> <i>tbc-3</i> RNAi* | 23.18±0.57 | 26 | -13 <sup><i>isp-1</i></sup><br>ctrl RNAi | 112/120 | 0.0003 <sup><i>isp-1</i></sup><br>ctrl RNAi               |         |
| <i>isp-1(qm150)</i> <i>snx-3</i> RNAi* | 21.94±0.62 | 26 | -17 <sup><i>isp-1</i></sup><br>ctrl RNAi | 96/119  | <0.0001 <sup><i>isp-1</i></sup><br><i>isp-1</i> ctrl RNAi | Fig. 4I |
| Wild-type control RNAi*                | 21.15±0.37 | 28 |                                          | 114/120 |                                                           |         |
| Wild-type <i>mon-2</i> RNAi*           | 19.61±0.3  | 25 | -7                                       | 104/120 | 0.0005                                                    |         |
| Wild-type <i>tbc-3</i> RNAi*           | 21.09±0.4  | 28 | 0                                        | 101/120 | 0.9746                                                    |         |
| Wild-type <i>snx-3</i> RNAi*           | 22.41±0.47 | 27 | 6                                        | 75/90   | 0.0829                                                    |         |
| <i>isp-1(qm150)</i> control RNAi*      | 28.27±0.72 | 39 | 34                                       | 112/120 | <0.0001                                                   |         |
| <i>isp-1(qm150)</i> <i>mon-2</i> RNAi* | 23.59±0.47 | 30 | -17 <sup><i>isp-1</i></sup><br>ctrl RNAi | 94/120  | <0.0001 <sup><i>isp-1</i></sup><br><i>isp-1</i> ctrl RNAi |         |
| <i>isp-1(qm150)</i> <i>tbc-3</i> RNAi* | 24.15±0.55 | 30 | -15 <sup><i>isp-1</i></sup><br>ctrl RNAi | 106/119 | <0.0001 <sup><i>isp-1</i></sup><br><i>isp-1</i> ctrl RNAi |         |
| <i>isp-1(qm150)</i> <i>snx-3</i> RNAi* | 24.43±0.44 | 30 | -14 <sup><i>isp-1</i></sup><br>ctrl RNAi | 99/120  | <0.0001 <sup><i>isp-1</i></sup><br><i>isp-1</i> ctrl RNAi |         |

In this table, the lifespan data sets within the thick solid lines were performed in parallel.

Experimental repeats were divided by bold dashed lines.

Statistical analysis was performed within the same data set. *p*-values were calculated using the log-rank (Mantel-Cox) method and calculated against the same control data [wild-type control RNAi or wild-type] or against indicated condition as superscript.

Δ: % change in lifespan was calculated against the same control data [wild-type control RNAi or wild-type] or against indicated condition as superscript.

\* indicates lifespan assay using 10 μM FUDR.

# indicates lifespan assay, which is the same experimental set with Fig. 3K and a repeat (Table S4).

**Table S6. The effect of *TFEB/hlh-30* RNAi or *Atg6/bec-1* RNAi on the lifespan of *isp-1(qm150)* mutants (related to Figure 5)**

| Strain/treatment                             | Mean survival<br>±SEM<br>(days) | 75th<br>percen<br>tile | %<br>change<br><sup>Δ</sup> | Number of<br>animals<br>that<br>died/total | p-value<br>vs.<br>control | Figure<br>in text |
|----------------------------------------------|---------------------------------|------------------------|-----------------------------|--------------------------------------------|---------------------------|-------------------|
| <i>isp-1(qm150)</i> control RNAi             | 26.98±0.88                      | 33                     |                             | 109/120                                    |                           | Fig. 5D           |
| <i>isp-1(qm150) hlh-30</i> RNAi              | 21.29±0.69                      | 25                     | -21                         | 73/90                                      | <0.0001                   | Fig. 5D           |
| <i>isp-1(qm150) bec-1</i> RNAi               | 19.61±0.28                      | 22                     | -27                         | 102/120                                    | <0.0001                   |                   |
| <i>isp-1(qm150) mon-2(xh22)</i> control RNAi | 18.47±0.46                      | 22                     | -32                         | 108/121                                    | <0.0001                   | Fig. 5D           |
| <i>isp-1(qm150) mon-2(xh22) hlh-30</i> RNAi  | 19.41±0.53                      | 22                     | -28                         | 78/120                                     | <0.0001                   | Fig. 5D           |
| <i>isp-1(qm150) mon-2(xh22) bec-1</i> RNAi   | 16.44±0.29                      | 19                     | -39                         | 107/117                                    | <0.0001                   |                   |
| <i>isp-1(qm150)</i> control RNAi             | 25.69±0.91                      | 33                     | 0                           | 81/90                                      |                           | Fig. 5E           |
| <i>isp-1(qm150) hlh-30</i> RNAi              | 21.68±0.6                       | 26                     | -16                         | 106/120                                    | 0.0001                    |                   |
| <i>isp-1(qm150) bec-1</i> RNAi               | 20.93±0.4                       | 22                     | -19                         | 116/120                                    | <0.0001                   | Fig. 5E           |
| <i>isp-1(qm150) mon-2(xh22)</i> control RNAi | 18.94±0.49                      | 22                     | -26                         | 105/120                                    | <0.0001                   | Fig. 5E           |
| <i>isp-1(qm150) mon-2(xh22) hlh-30</i> RNAi  | 20.22±0.47                      | 22                     | -21                         | 97/120                                     | <0.0001                   |                   |
| <i>isp-1(qm150) mon-2(xh22) bec-1</i> RNAi   | 18.23±0.31                      | 19                     | -29                         | 115/120                                    | <0.0001                   | Fig. 5E           |

In this table, the lifespan data sets within the thick solid lines were performed in parallel.

Experimental repeats were divided by bold dashed lines.

Statistical analysis was performed within the same data set. *p*-values were calculated using the log-rank (Mantel-Cox) method and calculated against the same control data [wild-type or *isp-1(qm150)* control RNAi].

<sup>Δ</sup>: % change in lifespan was calculated against the same control data [wild-type or *isp-1(qm150)* control RNAi].

## REFERENCES AND NOTES

1. B. S. Glick, A. Nakano, Membrane traffic within the Golgi apparatus. *Annu. Rev. Cell Dev. Biol.* **25**, 113–132 (2009).
2. A. Nakano, A. Luini, Passage through the Golgi. *Curr. Opin. Cell Biol.* **22**, 471–478 (2010).
3. E. Murén, M. Oyen, G. Barmark, H. Ronne, Identification of yeast deletion strains that are hypersensitive to brefeldin A or monensin, two drugs that affect intracellular transport. *Yeast* **18**, 163–172 (2001).
4. J. A. Efe, F. Plattner, N. Hulo, D. Kressler, S. D. Emr, O. Deloche, Yeast Mon2p is a highly conserved protein that functions in the cytoplasm-to-vacuole transport pathway and is required for Golgi homeostasis. *J. Cell Sci.* **118**, 4751–4764 (2005).
5. A. K. Gillingham, J. R. C. Whyte, B. Panic, S. Munro, Mon2, a relative of large Arf exchange factors, recruits Dop1 to the Golgi apparatus. *J. Biol. Chem.* **281**, 2273–2280 (2006).
6. T. Kanamori, T. Inoue, T. Sakamoto, K. Gengyo-Ando, M. Tsujimoto, S. Mitani, H. Sawa, J. Aoki, H. Arai,  $\beta$ -Catenin asymmetry is regulated by PLA<sub>1</sub> and retrograde traffic in *C. elegans* stem cell divisions. *EMBO J.* **27**, 1647–1657 (2008).
7. I. J. McGough, R. E. A. de Groot, A. P. Jellett, M. C. Betist, K. C. Varandas, C. M. Danson, K. J. Heesom, H. C. Korswagen, P. J. Cullen, SNX3-retromer requires an evolutionary conserved MON2:DOPEY2:ATP9A complex to mediate Wntless sorting and Wnt secretion. *Nat. Commun.* **9**, 3737 (2018).
8. M. Zhu, G. Wu, Y. X. Li, J. K. Stevens, C. X. Fan, A. Spang, M. Q. Dong, Serum- and glucocorticoid-inducible kinase-1 (SGK-1) plays a role in membrane trafficking in *Caenorhabditis elegans*. *PLOS ONE* **10**, e0130778 (2015).
9. K. B. Beer, J. Rivas-Castillo, K. Kuhn, G. Fazeli, B. Karmann, J. F. Nance, C. Stigloher, A. M. Wehman, Extracellular vesicle budding is inhibited by redundant regulators of TAT-5 flippase localization and phospholipid asymmetry. *Proc. Natl. Acad. Sci. U.S.A.* **115**, E1127–e1136 (2018).
10. J. H. Hurley, L. N. Young, Mechanisms of autophagy initiation. *Annu. Rev. Biochem.* **86**, 225–244 (2017).
11. A. Meléndez, B. Levine, Autophagy in *C. elegans*, in *WormBook: The Online Review of C. elegans Biology* (2009).

12. A. Alberti, X. Michelet, A. Djeddi, R. Legouis, The autophagosomal protein LGG-2 acts synergistically with LGG-1 in dauer formation and longevity in *C. elegans*. *Autophagy* **6**, 622–633 (2010).
13. M. Manil-Ségalen, C. Lefebvre, C. Jenzer, M. Trichet, C. Boulogne, B. Satiat-Jeunemaitre, R. Legouis, The *C. elegans* LC3 acts downstream of GABARAP to degrade autophagosomes by interacting with the HOPS subunit VPS39. *Dev. Cell* **28**, 43–55 (2014).
14. C. Jenzer, M. Manil-Ségalen, C. Lefebvre, C. Largeau, A. Glatigny, R. Legouis, Human GABARAP can restore autophagosome biogenesis in a *C. elegans* *lgg-1* mutant. *Autophagy* **10**, 1868–1872 (2014).
15. F. Wu, Y. Watanabe, X.-Y. Guo, X. Qi, P. Wang, H.-Y. Zhao, Z. Wang, Y. Fujioka, H. Zhang, J.-Q. Ren, T.-C. Fang, Y.-X. Shen, W. Feng, J.-J. Hu, N. N. Noda, H. Zhang, Structural basis of the differential function of the two *C. elegans* Atg8 homologs, LGG-1 and LGG-2, in autophagy. *Mol. Cell* **60**, 914–929 (2015).
16. L. R. Lapierre, C. D. De Magalhaes Filho, P. R. McQuary, C. C. Chu, O. Visvikis, J. T. Chang, S. Gelino, B. Ong, A. E. Davis, J. E. Irazoqui, A. Dillin, M. Hansen, The TFEB orthologue HLH-30 regulates autophagy and modulates longevity in *Caenorhabditis elegans*. *Nat. Commun.* **4**, 2267 (2013).
17. M. Hansen, D. C. Rubinsztein, D. W. Walker, Autophagy as a promoter of longevity: Insights from model organisms. *Nat. Rev. Mol. Cell Biol.* **19**, 579–593 (2018).
18. A. B. Hwang, D.-E. Jeong, S.-J. Lee, Mitochondria and organismal longevity. *Curr. Genomics* **13**, 519–532 (2012).
19. C. Yee, W. Yang, S. Hekimi, The intrinsic apoptosis pathway mediates the pro-longevity response to mitochondrial ROS in *C. elegans*. *Cell* **157**, 897–909 (2014).
20. D. Cristina, M. Cary, A. Lunceford, C. Clarke, C. Kenyon, A regulated response to impaired respiration slows behavioral rates and increases lifespan in *Caenorhabditis elegans*. *PLOS Genet.* **5**, e1000450 (2009).
21. M. M. Senchuk, D. J. Dues, C. E. Schaar, B. K. Johnson, Z. B. Madaj, M. J. Bowman, M. E. Winn, J. M. Van Raamsdonk, Activation of DAF-16/FOXO by reactive oxygen species contributes to longevity in long-lived mitochondrial mutants in *Caenorhabditis elegans*. *PLOS Genet.* **14**, e1007268 (2018).

2. D. J. Dues, C. E. Schaar, B. K. Johnson, M. J. Bowman, M. E. Winn, M. M. Senchuk, J. M. Van Raamsdonk, Uncoupling of oxidative stress resistance and lifespan in long-lived *isp-1* mitochondrial mutants in *Caenorhabditis elegans*. *Free Radic. Biol. Med.* **108**, 362–373 (2017).
23. S. Park, M. Artan, S. H. Han, H.-H. Park, Y. Jung, A. B. Hwang, W. S. Shin, K.-T. Kim, S.-V. Lee, VRK-1 extends life span by activation of AMPK via phosphorylation. *Sci. Adv.* **6**, eaaw7824 (2020).
24. U. B. Kang, J. Yeom, H. Kim, C. Lee, Quantitative analysis of mTRAQ-labeled proteome using full MS scans. *J. Proteome Res.* **9**, 3750–3758 (2010).
25. D. M. Walther, P. Kasturi, M. Zheng, S. Pinkert, G. Vecchi, P. Ciryam, R. I. Morimoto, C. M. Dobson, M. Vendruscolo, M. Mann, F. U. Hartl, Widespread proteome remodeling and aggregation in aging *C. elegans*. *Cell* **161**, 919–932 (2015).
26. A. Jochum, D. Jackson, H. Schwarz, R. Pipkorn, B. Singer-Krüger, Yeast Ysl2p, homologous to Sec7 domain guanine nucleotide exchange factors, functions in endocytosis and maintenance of vacuole integrity and interacts with the Arf-Like small GTPase Arl1p. *Mol. Cell. Biol.* **22**, 4914–4928 (2002).
27. P. Kapahi, M. Kaeberlein, M. Hansen, Dietary restriction and lifespan: Lessons from invertebrate models. *Ageing Res. Rev.* **39**, 3–14 (2017).
28. D. Mahajan, B. K. Boh, Y. Zhou, L. Chen, T. C. Cornvik, W. Hong, L. Lu, Mammalian Mon2/Ysl2 regulates endosome-to-Golgi trafficking but possesses no guanine nucleotide exchange activity toward Arl1 GTPase. *Sci. Rep.* **3**, 3362 (2013).
29. S. B. Zhao, N. Dean, X. D. Gao, M. Fujita, MON2 guides Wntless transport to the Golgi through recycling endosomes. *Cell Struct. Funct.* **45**, 77–92 (2020).
30. C. C.-H. Chen, P. J. Schweinsberg, S. Vashist, D. P. Mareiniss, E. J. Lambie, B. D. Grant, RAB-10 is required for endocytic recycling in the *Caenorhabditis elegans* intestine. *Mol. Biol. Cell* **17**, 1286–1297 (2006).
31. N. Ventura, S. L. Rea, A. Schiavi, A. Torgovnick, R. Testi, T. E. Johnson, p53/CEP-1 increases or decreases lifespan, depending on level of mitochondrial bioenergetic stress. *Aging Cell* **8**, 380–393 (2009).
32. A. Torgovnick, A. Schiavi, R. Testi, N. Ventura, A role for p53 in mitochondrial stress response control of longevity in *C. elegans*. *Exp. Gerontol.* **45**, 550–557 (2010).
33. A. Baruah, H. Chang, M. Hall, J. Yuan, S. Gordon, E. Johnson, L. L. Shtessel, C. Yee, S. Hekimi, W. B. Derry, S. S. Lee, CEP-1, the *Caenorhabditis elegans* p53 homolog, mediates opposing

longevity outcomes in mitochondrial electron transport chain mutants. *PLOS Genet.* **10**, e1004097 (2014).

34. S.-J. Lee, A. B. Hwang, C. Kenyon, Inhibition of respiration extends *C. elegans* life span via reactive oxygen species that increase HIF-1 activity. *Curr. Biol.* **20**, 2131–2136 (2010).
35. A. B. Hwang, E. A. Ryu, M. Artan, H. W. Chang, M. H. Kabir, H. J. Nam, D. Lee, J. S. Yang, S. Kim, W. B. Mair, C. Lee, S. S. Lee, S. J. Lee, Feedback regulation via AMPK and HIF-1 mediates ROS-dependent longevity in *Caenorhabditis elegans*. *Proc. Natl. Acad. Sci. U.S.A.* **111**, E4458–E4467 (2014).
36. K. Zarse, S. Schmeisser, M. Groth, S. Priebe, G. Beuster, D. Kuhlow, R. Guthke, M. Platzer, C. R. Kahn, M. Ristow, Impaired insulin/IGF1 signaling extends life span by promoting mitochondrial L-proline catabolism to induce a transient ROS signal. *Cell Metab.* **15**, 451–465 (2012).
37. R. Curtis, G. O'Connor, P. S. DiStefano, Aging networks in *Caenorhabditis elegans*: AMP-activated protein kinase (*aak-2*) links multiple aging and metabolism pathways. *Aging Cell* **5**, 119–126 (2006).
38. W. Yang, S. Hekimi, A mitochondrial superoxide signal triggers increased longevity in *Caenorhabditis elegans*. *PLOS Biol.* **8**, e1000556 (2010).
39. L. Walter, A. Baruah, H.-W. Chang, H. M. Pace, S. S. Lee, The homeobox protein CEH-23 mediates prolonged longevity in response to impaired mitochondrial electron transport chain in *C. elegans*. *PLOS Biol.* **9**, e1001084 (2011).
40. A. Springhorn, T. Hoppe, Western blot analysis of the autophagosomal membrane protein LGG-1/LC3 in *Caenorhabditis elegans*. *Methods Enzymol.* **619**, 319–336 (2019).
41. N. Mizushima, T. Yoshimori, B. Levine, Methods in mammalian autophagy research. *Cell* **140**, 313–326 (2010).
42. Z. Zhang, H. Gu, Q. Li, J. Zheng, S. Cao, C. Weng, H. Jia, GABARAPL2 is critical for growth restriction of *Toxoplasma gondii* in HeLa cells treated with gamma interferon. *Infect. Immun.* **88**, e00054–20 (2020).
43. J. C. Pascall, S. Rotondo, A. S. Mukadam, D. Oxley, J. Webster, S. A. Walker, J. Piron, C. Carter, N. T. Ktistakis, G. W. Butcher, The immune system GTPase GIMAP6 interacts with the Atg8 homologue GABARAPL2 and is recruited to autophagosomes. *PLOS ONE* **8**, e77782 (2013).
44. S. Kimura, T. Noda, T. Yoshimori, Dissection of the autophagosome maturation process by a novel reporter protein, tandem fluorescent-tagged LC3. *Autophagy* **3**, 452–460 (2007).

45. Q. Zhang, X. Wu, P. Chen, L. Liu, N. Xin, Y. Tian, A. Dillin, The mitochondrial unfolded protein response is mediated cell-non-autonomously by retromer-dependent Wnt signaling. *Cell* **174**, 870–883.e17 (2018).
46. D.-E. Jeong, D. Lee, S.-Y. Hwang, Y. Lee, J.-E. Lee, M. Seo, W. Hwang, K. Seo, A. B. Hwang, M. Artan, H. G. Son, J.-H. Jo, H. Baek, Y. M. Oh, Y. Ryu, H.-J. Kim, C. M. Ha, J.-Y. Yoo, S.-J. V. Lee, Mitochondrial chaperone HSP-60 regulates anti-bacterial immunity via p38 MAP kinase signaling. *EMBO J.* **36**, 1046–1065 (2017).
47. B. Kalderon, G. Kogan, E. Bubis, O. Pines, Cytosolic Hsp60 can modulate proteasome activity in yeast. *J. Biol. Chem.* **290**, 3542–3551 (2015).
8. S. Nakamura, Ö. Karalay, P. S. Jäger, M. Horikawa, C. Klein, K. Nakamura, C. Latza, S. E. Templer, C. Dieterich, A. Antebi, Mondo complexes regulate TFEB via TOR inhibition to promote longevity in response to gonadal signals. *Nat. Commun.* **7**, 10944 (2016).
49. T. Noda, Autophagy in the context of the cellular membrane-trafficking system: The enigma of Atg9 vesicles. *Biochem. Soc. Trans.* **45**, 1323–1331 (2017).
50. A. R. J. Young, E. Y. W. Chan, X. W. Hu, R. Köchl, S. G. Crawshaw, S. High, D. W. Hailey, J. Lippincott-Schwartz, S. A. Tooze, Starvation and ULK1-dependent cycling of mammalian Atg9 between the TGN and endosomes. *J. Cell Sci.* **119**, 3888–3900 (2006).
51. W. L. Yen, J. E. Legakis, U. Nair, D. J. Klionsky, Atg27 is required for autophagy-dependent cycling of Atg9. *Mol. Biol. Cell* **18**, 581–593 (2007).
52. Y. Sagiv, A. Legesse-Miller, A. Porat, Z. Elazar, GATE-16, a membrane transport modulator, interacts with NSF and the Golgi v-SNARE GOS-28. *EMBO J.* **19**, 1494–1504 (2000).
53. J. Zhang, X. Zhang, G. Liu, D. Chang, X. Liang, X. Zhu, W. Tao, L. Mei, Intracellular trafficking network of protein nanocapsules: Endocytosis, exocytosis and autophagy. *Theranostics* **6**, 2099–2113 (2016).
54. C. Puri, M. Vicinanza, A. Ashkenazi, M. J. Gratian, Q. Zhang, C. F. Bento, M. Renna, F. M. Menzies, D. C. Rubinsztein, The RAB11A-positive compartment is a primary platform for autophagosome assembly mediated by WIPI2 recognition of PI3P-RAB11A. *Dev. Cell* **45**, 114–131.e8 (2018).
55. S. A. Tooze, T. Yoshimori, The origin of the autophagosomal membrane. *Nat. Cell Biol.* **12**, 831–835 (2010).

56. D. C. Rubinsztein, T. Shpilka, Z. Elazar, Mechanisms of autophagosome biogenesis. *Curr. Biol.* **22**, R29-R34 (2012).
57. M. Hamasaki, N. Furuta, A. Matsuda, A. Nezu, A. Yamamoto, N. Fujita, H. Oomori, T. Noda, T. Haraguchi, Y. Hiraoka, A. Amano, T. Yoshimori, Autophagosomes form at ER-mitochondria contact sites. *Nature* **495**, 389–393 (2013).
58. L. Ge, M. Zhang, R. Schekman, Phosphatidylinositol 3-kinase and COPII generate LC3 lipidation vesicles from the ER-Golgi intermediate compartment. *eLife* **3**, e04135 (2014).
59. L. Ge, D. Melville, M. Zhang, R. Schekman, The ER-Golgi intermediate compartment is a key membrane source for the LC3 lipidation step of autophagosome biogenesis. *eLife* **2**, e00947 (2013).
60. A. Ruck, J. Attonito, K. T. Garces, L. Núñez, N. J. Palmisano, Z. Rubel, Z. Bai, K. C. Q. Nguyen, L. Sun, B. D. Grant, D. H. Hall, A. Meléndez, The Atg6/Vps30/Bec1 1 ortholog BEC-1 mediates endocytic retrograde transport in addition to autophagy in *C. elegans*. *Autophagy* **7**, 386–400 (2011).
61. C. F. Bento, C. Puri, K. Moreau, D. C. Rubinsztein, The role of membrane-trafficking small GTPases in the regulation of autophagy. *J. Cell Sci.* **126**, 1059–1069 (2013).
62. T. Stiernagle, Maintenance of *C. elegans*, in *WormBook: The Online Review of C. elegans Biology* (2006).
63. J. Fredens, K. Engholm-Keller, A. Giessing, D. Pultz, M. R. Larsen, P. Højrup, J. Møller-Jensen, N. J. Færgeman, Quantitative proteomics by amino acid labeling in *C. elegans*. *Nat. Methods* **8**, 845–847 (2011).
64. J. Yeom, M. H. Kabir, C. Lee, Impact of data-dependent exclusion list based mass spectrometry on label-free proteomic quantification. *Rapid Commun. Mass Spectrom.* **29**, 128–134 (2015).
65. K. Park, J. Y. Yoon, S. Lee, E. Paek, H. Park, H. J. Jung, S. W. Lee, Isotopic peak intensity ratio based algorithm for determination of isotopic clusters and monoisotopic masses of polypeptides from high-resolution mass spectrometric data. *Anal. Chem.* **80**, 7294–7303 (2008).
66. J. Y. Yoon, K. Y. Lim, S. Lee, K. Park, E. Paek, U. B. Kang, J. Yeom, C. Lee, Improved quantitative analysis of mass spectrometry using quadratic equations. *J. Proteome Res.* **9**, 2775–2785 (2010).
67. J. Y. Yoon, J. Yeom, H. Lee, K. Kim, S. Na, K. Park, E. Paek, C. Lee, High-throughput peptide quantification using mTRAQ reagent triplex. *BMC Bioinformatics* **12** Suppl 1, S46 (2011).
68. J. Feng, F. Bussière, S. Hekimi, Mitochondrial electron transport is a key determinant of life span in *Caenorhabditis elegans*. *Dev. Cell* **1**, 633–644 (2001).

69. M. A. Larkin, G. Blackshields, N. P. Brown, R. Chenna, P. A. McGettigan, H. McWilliam, F. Valentin, I. M. Wallace, A. Wilm, R. Lopez, J. D. Thompson, T. J. Gibson, D. G. Higgins, Clustal W and clustal X version 2.0. *Bioinformatics* **23**, 2947–2948 (2007).
70. J. S. Yang, H. J. Nam, M. Seo, S. K. Han, Y. Choi, H. G. Nam, S. J. Lee, S. Kim, OASIS: Online application for the survival analysis of lifespan assays performed in aging research. *PLOS ONE* **6**, e23525 (2011).
71. S. K. Han, D. Lee, H. Lee, D. Kim, H. G. Son, J. S. Yang, S.-J. V. Lee, S. Kim, OASIS 2: Online application for survival analysis 2 with features for the analysis of maximal lifespan and healthspan in aging research. *Oncotarget* **7**, 56147–56152 (2016).
72. D. W. Huang, B. T. Sherman, R. A. Lempicki, Systematic and integrative analysis of large gene lists using DAVID bioinformatics resources. *Nat. Protoc.* **4**, 44–57 (2009).
73. A. D. Holdorf, D. P. Higgins, A. C. Hart, P. R. Boag, G. J. Pazour, A. J. M. Walhout, A. K. Walker, WormCat: An online tool for annotation and visualization of *Caenorhabditis elegans* genome-scale data. *Genetics* **214**, 279–294 (2020).
4. E. Munkácsy, M. H. Khan, R. K. Lane, M. B. Borror, J. H. Park, A. F. Bokov, A. L. Fisher, C. D. Link, S. L. Rea, DLK-1, SEK-3 and PMK-3 are required for the life extension induced by mitochondrial bioenergetic disruption in *C. elegans*. *PLOS Genet.* **12**, e1006133 (2016).
75. W. Suthammarak, P. G. Morgan, M. M. Sedensky, Mutations in mitochondrial complex III uniquely affect complex I in *Caenorhabditis elegans*. *J. Biol. Chem.* **285**, 40724–40731 (2010).
76. H. G. Son, K. Seo, M. Seo, S. Park, S. Ham, S. W. A. An, E.-S. Choi, Y. Lee, H. Baek, E. Kim, Y. Ryu, C. M. Ha, A.-L. Hsu, T.-Y. Roh, S. K. Jang, S.-J. V. Lee, Prefoldin 6 mediates longevity response from heat shock factor 1 to FOXO in *C. elegans*. *Genes Dev.* **32**, 1562–1575 (2018).
77. M. B. E. Schaaf, T. G. Keulers, M. A. Vooijs, K. M. A. Rouschop, LC3/GABARAP family proteins: Autophagy-(un)related functions. *FASEB J.* **30**, 3961–3978 (2016).
